# Supplementary material for: The transcriptional co-repressor Runx1t1 is essential for MYCN-driven neuroblastoma tumorigenesis
Source: PubMed Central journal article supplement (PMC11239676; doi:10.1038/s41467-024-49871-0), 2024-07-11
Supplement: 41467_2024_49871_MOESM1_ESM.pdf [file 41467_2024_49871_MOESM1_ESM.pdf]

## Supplementary Information

### The transcriptional co-repressor Runx1t1 is essential for MYCN-driven neuroblastoma tumorigenesis

Jayne E. Murray<sup>1,13</sup>, Emanuele Valli<sup>1,13</sup>, Giorgio Milazzo<sup>2,13</sup>, Chelsea Mayoh<sup>1,3</sup>, Andrew J. Gifford<sup>1,3,4</sup>, Jamie I. Fletcher<sup>1,3</sup>, Chengyuan Xue<sup>1</sup>, Nisitha Jayatilleke<sup>1</sup>, Firoozeh Salehzadeh<sup>1</sup>, Laura D. Gamble<sup>1</sup>, Jourdin R. C. Rouaen<sup>1</sup>, Daniel R. Carter<sup>1,3,5</sup>, Helen Forgham<sup>1</sup>, Eric O. Sekyere<sup>1</sup>, Joanna Keating<sup>1</sup>, Georgina Eden<sup>1</sup>, Sophie Allan<sup>1</sup>, Stephanie Alfred<sup>1</sup>, Frances K. Kusuma<sup>1</sup>, Ashleigh Clark<sup>1</sup>, Hannah Webber<sup>1</sup>, Amanda J. Russell<sup>1,15</sup>, Antoine de Weck<sup>1</sup>, Benjamin T. Kile<sup>6,7</sup>, Martina Santulli<sup>2</sup>, Piergiuseppe De Rosa<sup>2</sup>, Emmy D. G. Fleuren<sup>1</sup>, Weiman Gao<sup>1</sup>, Lorna Wilkinson-White<sup>8</sup>, Jason K. K. Low<sup>9</sup>, Joel P. Mackay<sup>9</sup>, Glenn M. Marshall<sup>1,3,10</sup>, Douglas J. Hilton<sup>7</sup>, Federico M. Giorgi<sup>2</sup>, Jan Koster<sup>11</sup>, Giovanni Perini<sup>2,14</sup>, Michelle Haber<sup>1,4,14</sup>, Murray D. Norris<sup>1,12,14,\*</sup>

<sup>1</sup>Children's Cancer Institute, Lowy Cancer Centre, UNSW Sydney, Kensington, NSW, 2031, Australia.

<sup>2</sup>Department of Pharmacy and Biotechnology, University of Bologna, 40126 Bologna, Italy.

<sup>3</sup>School of Clinical Medicine, UNSW Sydney, NSW, Australia.

<sup>4</sup>Anatomical Pathology, NSW Health Pathology, Prince of Wales Hospital, Randwick, NSW, Australia.

<sup>5</sup>School of Biomedical Engineering, University of Technology Sydney, Broadway, NSW, Australia.

<sup>6</sup>Monash Biomedicine Discovery Institute, Monash University, Melbourne, Australia.

<sup>7</sup>The Walter and Eliza Hall Institute of Medical Research, Parkville, Victoria, Australia.

<sup>8</sup>Sydney Analytical Core Research Facility, The University of Sydney, Sydney, Australia.

<sup>9</sup>School of Life and Environmental Sciences, The University of Sydney, Sydney Australia.

<sup>10</sup>Kids Cancer Centre, Sydney Children's Hospital, Randwick, NSW, Australia.

<sup>11</sup>Academic Medical Center, University of Amsterdam, Amsterdam, Netherlands.

<sup>12</sup>UNSW Centre for Childhood Cancer Research, UNSW Sydney, NSW, Australia.

<sup>13</sup>These authors contributed equally: Jayne E Murray, Emanuele Valli, Giorgio Milazzo.

<sup>14</sup>These authors jointly supervised this work: Giovanni Perini, Michelle Haber, Murray D Norris.

<sup>15</sup>Present address: Garvan Institute of Medical Research, Darlinghurst, NSW, Australia

\*Correspondence Murray Norris, Email: : [mnorris@ccia.unsw.edu.au](mailto:mnorris@ccia.unsw.edu.au)

# Inventory of Supporting Information

## Supplementary Figures

1. Supp Fig. 1 ENU mutagenesis identifies Runx1t1 responsible for loss of tumor formation.
2. Supp Fig. 2 Runx1t1 protein translation driven by MYCN...
3. Supp Fig. 3 RUNX1T1 loss leads to downregulation of MYCN dimerization partner MAX
4. Supp Fig. 4 Colony formation and histopathology staining following ...
5. Supp Fig. 5 RUNX1T1 forms part of an LCH repressor complex
6. Supp Fig. 6 RUNX1T1 depletion downregulates Hallmark oxidative phosphorylation...
7. Supp Fig. 7 RUNX1T1 loss reduces proliferation in alveolar rhabdomyosarcoma ...

## Supplementary Tables

1. Supp Table 1 Doxycycline-induced knockdown of RUNX1T1 in KELLY xenografts
2. Supp Table 2 Primers and probes used in real-time PCR analysis for mouse genotyping
3. Supp Table 3 Primers for expression assays
4. Supp Table 4 Primers used to create 5'UTR RUNX1T1 constructs
5. Supp Table 5 Sequence of oligos used to create RUNX1T1 shRNA constructs
6. Supp Table 6 Primers used to create mutant RUNX1T1 con
7. Supp Table 7 Primers for Max CHIP-qPCR assays
8. Supp Table 8 Antibodies used

## Supplementary Fig. 1

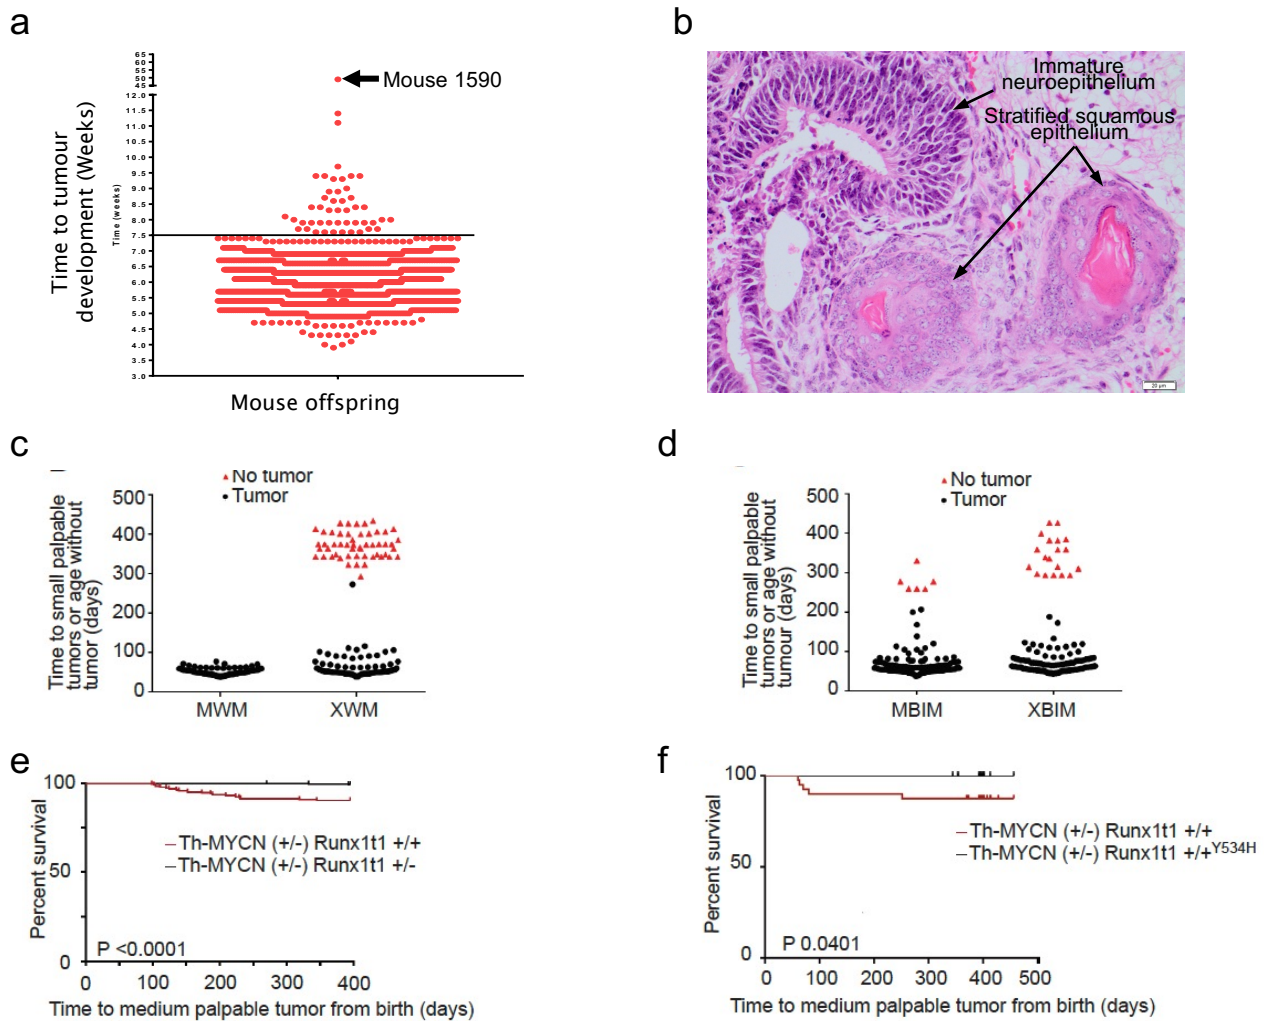

**Supplementary Fig. 1: ENU mutagenesis identifies Runx1t1 responsible for loss of tumor formation.** (a) Tumor delay in offspring of female Th-MYCN mice crossed with ENU-treated male mice (n=1716). (b) H&E staining of the tumor from mouse #1590 demonstrating different cell types. (c) Backcrossing of the #1590 line to Balb/c mice compared to non-mutated Th-MYCN mice backcrossed in the same fashion. Mice that developed tumors are shown as black circles while those that did not develop tumors are shown as red triangles. MWM are unmutated Th-MYCN mice crossed with Balb/c and then backcrossed to Th-MYCN mice (n=107), and XWM represent #1590 mutated mice crossed in the same way (n=149) (d) Backcrossing of the #1590 line to C57BL/6 mice compared to non-mutated Th-MYCN mice backcrossed in the same fashion. Mice that developed tumors are shown as black circles while those that did not develop tumors are shown as red triangles. MBIM are unmutated Th-MYCN mice crossed with C57BL/6 and then backcrossed to Th-MYCN mice (n=115), and XBIM represent #1590 mutated mice crossed in the same way (n=144) (e) Kaplan-Meier survival analysis of mice hemizygous for the Th-MYCN transgene and with heterozygous knock-out of Runx1t1 (i.e. Th-MYCN (+/-); Runx1t1 (+/-); black line; n=347) demonstrate significantly decreased tumor incidence by comparison with hemizygous Th-MYCN mice with wild-type Runx1t1 (i.e. Th-MYCN (+/-); Runx1t1 (+/+); red line; n=183; p<0.0001 by log-rank test). (f) Kaplan-Meier survival curve of mice hemizygous for the Th-MYCN transgene and either wild-type for Runx1t1 (red; n=40) or harboring the Runx1t1 Y534H mutation (black; n=32, p = 0.0401 by log-rank test).

## Supplementary Fig. 2

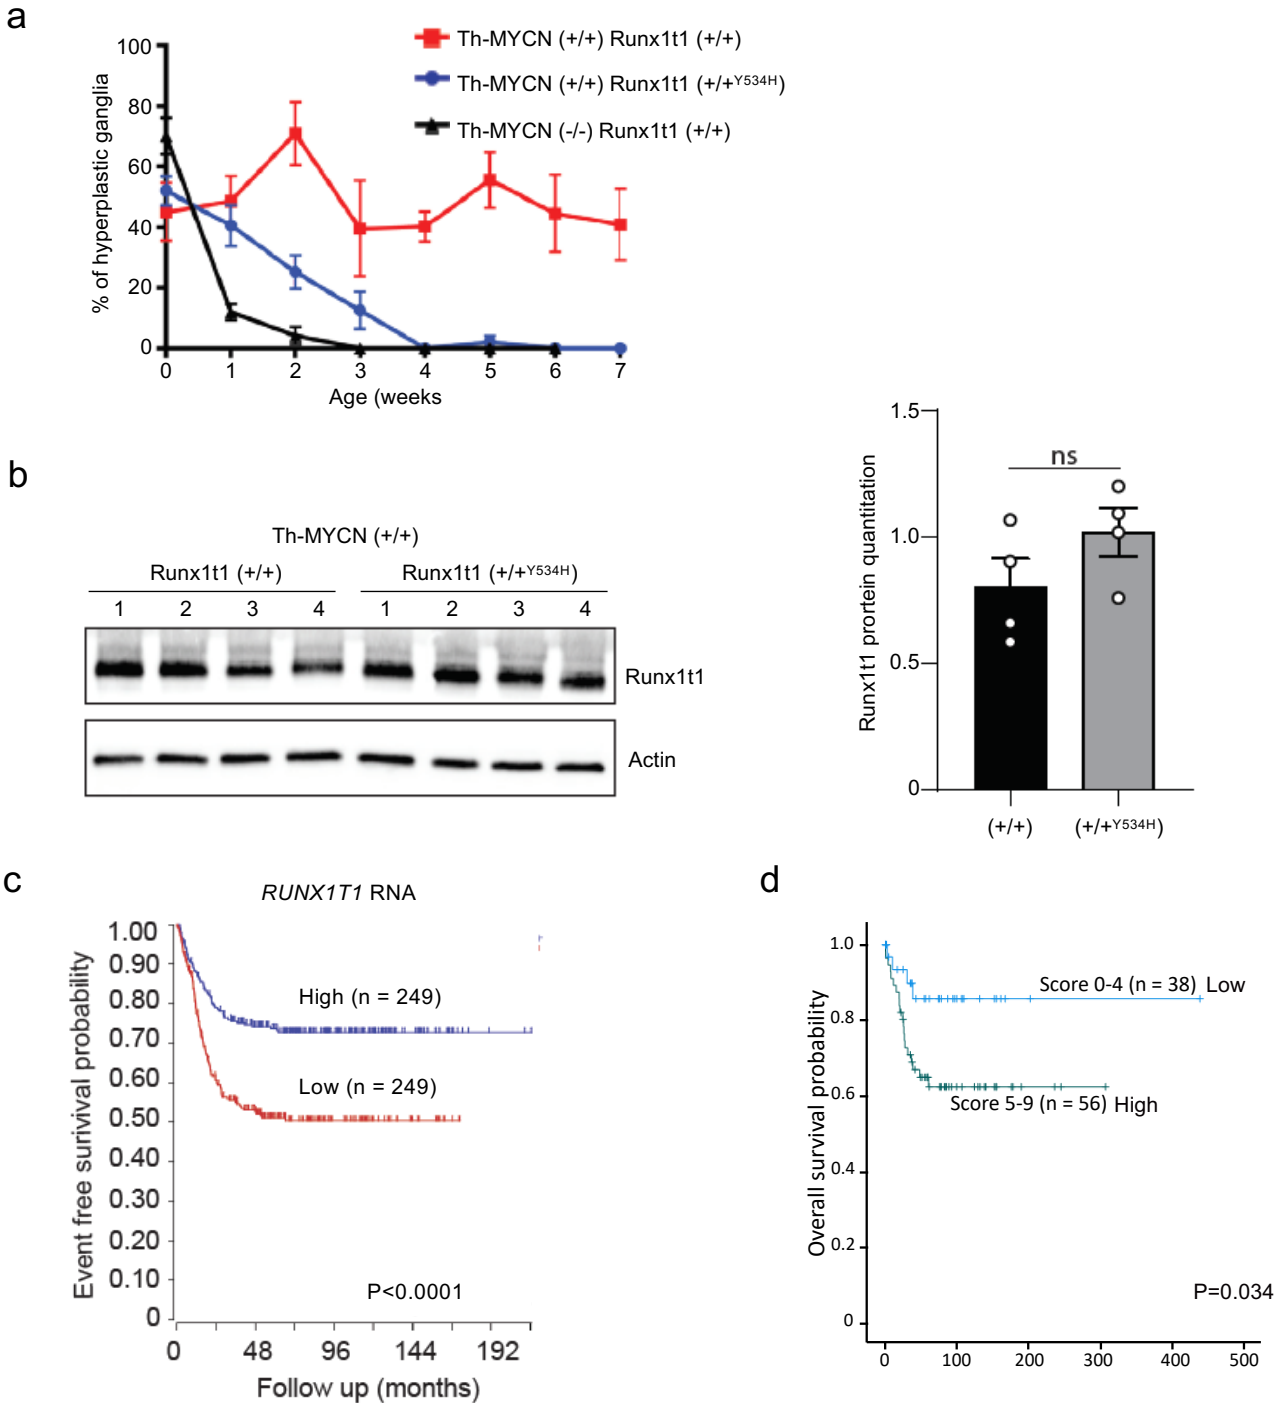

**Supplementary Fig. 2: Runx1t1 protein translation driven by MYCN is required to sustain MYCN-mediated hyperplasia.** (a) The percentage neuroblast hyperplasia scored from homozygous or wild-type Th-MYCN mice, with either wild-type or mutated (Y534H) Runx1t1. Scoring of  $\geq 3$  mice was done for each genotype and timepoint. Th-MYCN (+/+) Runx1t1 (+/+) all time points  $n=4$  except day 0 ( $n=9$ ), 4 weeks ( $n=3$ ), 5 weeks ( $n=8$ ), 7 weeks ( $n=7$ ); Th-MYCN (+/+) Runx1t1 (+/+Y534H) all time points  $n=5$  except day 0, 1 and 2 weeks ( $n=6$ ), 7 weeks ( $n=3$ ); Th-MYCN (-/-) Runx1t1 (+/+) all time points  $n=4$  except day 0 ( $n=10$ ), 1 and 2 weeks ( $n=6$ ), 5 weeks ( $n=5$ ). (b) Western Blot of Runx1t1 on brain tissue samples obtained at Day 0 from mice homozygous for the Th-MYCN transgene and either wild-type (+/+) or mutant (+/+Y534H) for Runx1t1, demonstrating no significant difference in protein levels. Quantitation of western blot, relative to the Actin control. Values represent means of 4 different brain samples for each genotype  $\pm$  SEM. Each data point shows the mean value of 3 independent Western blots. Mann Whitney 2-tailed test  $p=0.2$  (c) Kaplan-Meier survival analysis of RUNX1T1 expression levels in the publicly available RNAseq dataset of 498 human neuroblastoma samples from the neuroblastoma R2 database. Cohort was cut at the median into high ( $n=249$ ) and low ( $n=249$ ) RUNX1T1 expression,  $p < 0.0001$  (log-rank test). (d) Kaplan-Meier survival analysis based on RUNX1T1 protein expression in a TMA of primary neuroblastoma ( $n=77$ ), ganglioneuroblastoma ( $n=5$ ) and ganglioneuroma ( $n=12$ ). Samples were grouped based on the RUNX1T1 score 0-4 ( $n=38$ ) and 4-9 ( $n=56$ ); ( $p=0.034$ ).

# Supplementary Fig. 3

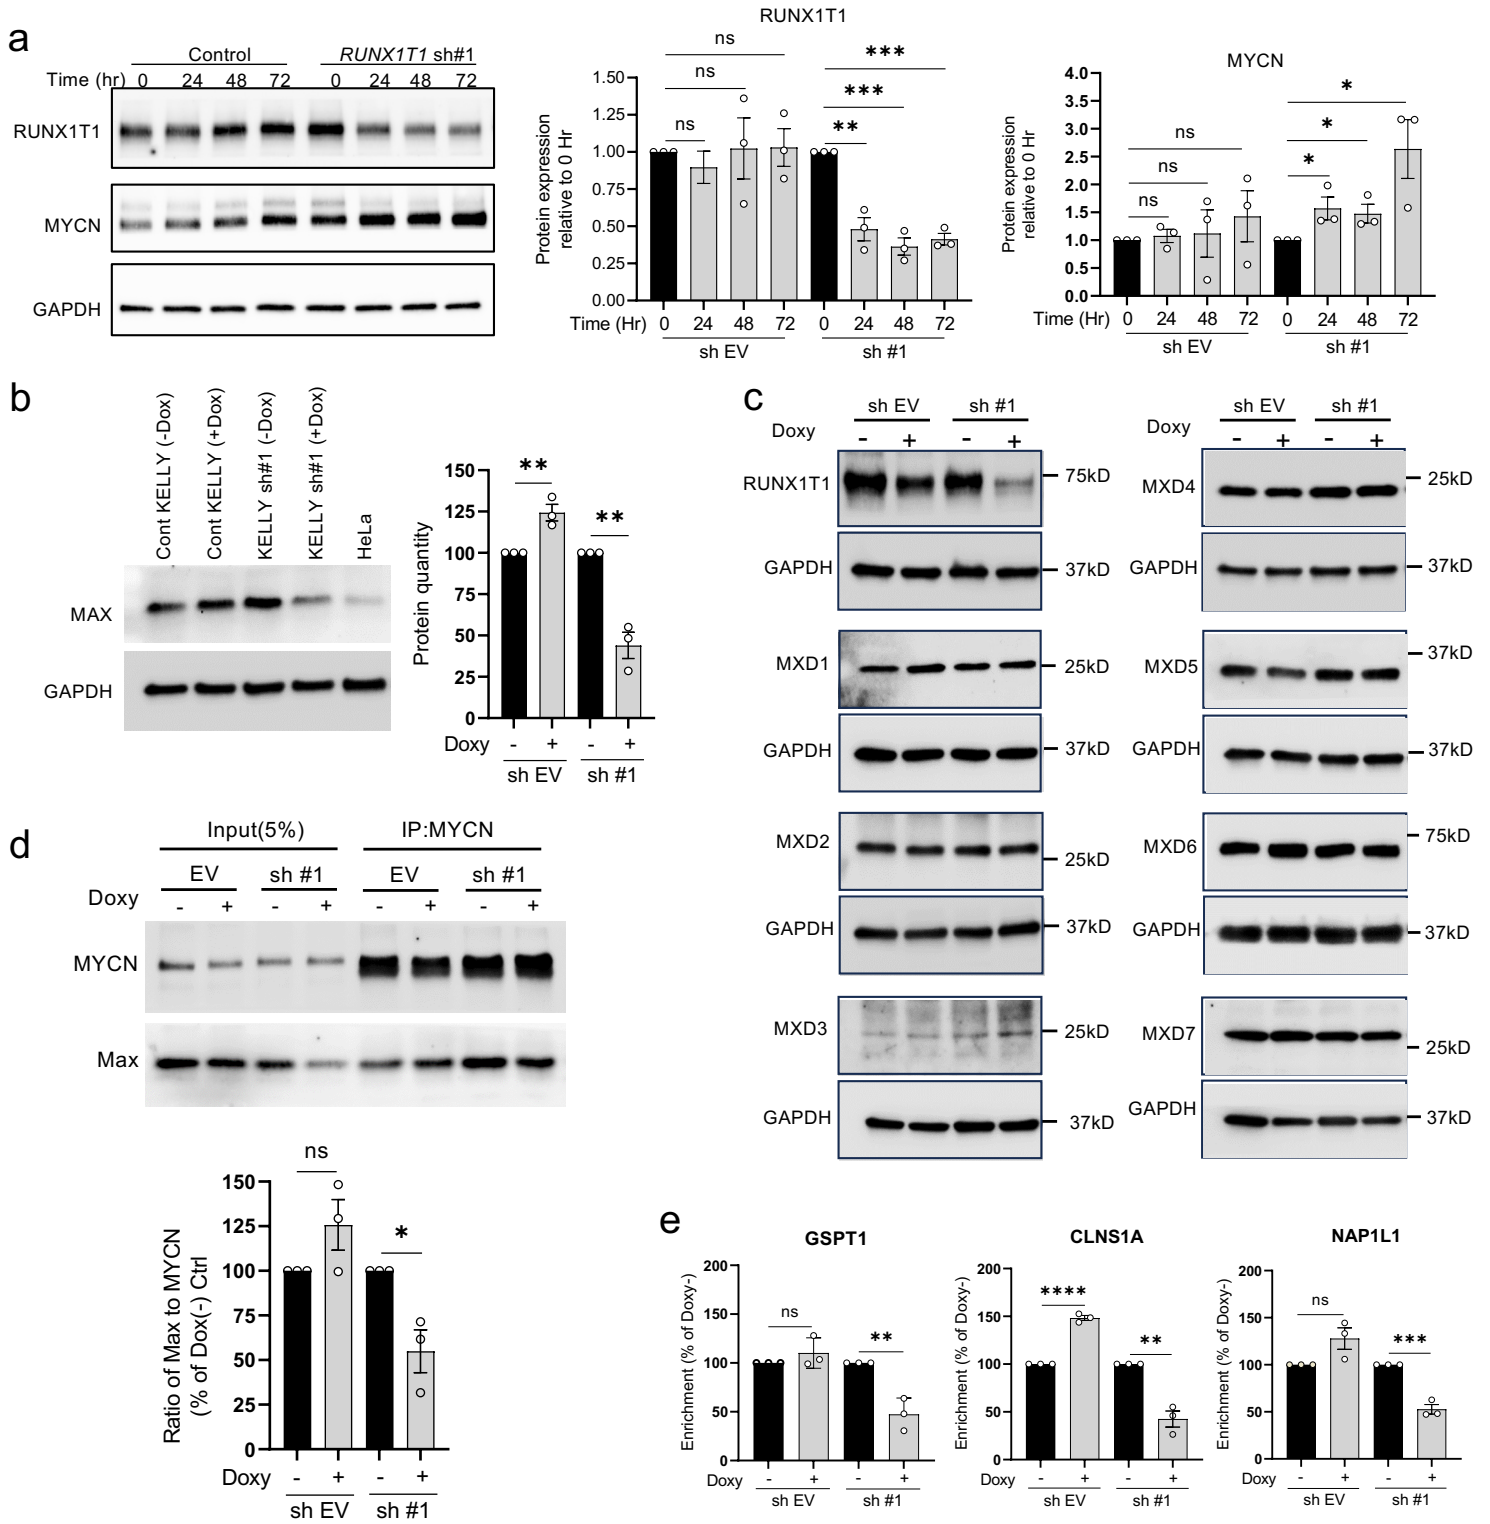

**Supplementary Fig. 3: RUNX1T1 loss leads to downregulation of MYCN dimerization partner MAX.** (a) Following RUNX1T1 shRNA downregulation in KELLY cells, RUNX1T1 and MYCN protein levels were monitored at 24, 48 and 72 hr timepoints. Despite a significant decrease in RUNX1T1 ( $p < 0.05$ ), MYCN protein was significantly increased. Values are mean  $\pm$  SEM from 3 independent experiments. Two-tailed unpaired t-test (RUNX1T1 shEV 24hr  $p=0.3973$ , 48hr  $p=0.9152$ , 72hr  $p=0.8254$ ; sh#1 24hr  $p=0.0026$ , 48hr  $p=0.0004$ , 72hr  $p=0.0001$ ; MYCN shEV 24hr  $p=0.5479$ , 48hr  $p=0.7921$ , 72hr  $p=0.4004$ ; sh#1 24hr  $p=0.0499$ , 48hr  $p=0.0462$ , 72hr  $p=0.0363$ ) (b) Doxycycline-induced knockdown of RUNX1T1 (72 hrs; 1  $\mu$ g/mL) in KELLY cells significantly reduced MAX protein levels. Values represent means from 3 independent experiments  $\pm$  SEM. Two-tailed unpaired t-test shEV  $p=0.0083$ , sh#1  $p=0.0021$ . (c) Western blots show no significant changes in expression of seven Max binding partners following knockdown of RUNX1T1 with shRNA in KELLY cells. Each experiment has been repeated three times with similar results. (d) Co-IP with MYCN antibodies following shRNA knockdown of RUNX1T1 in KELLY cells led to a significant reduction in the ratio MAX:MYCN binding by comparison with control cells (ns  $p=0.1436$ , \* $p=0.0196$ ) and (e) significantly decreased binding of MYCN to the promoter of target genes GSPT1, CLNS1A and NAP1L1, as determined by ChIP-qPCR. Two-tailed unpaired t-test GSPT1 ns  $p=0.3199$ , \*\* $p=0.0054$ ; CLNS1A \*\*  $p=0.002$ , \*\*\*\*  $p<0.0001$ ; NAP1L1 ns  $p=0.0715$ , \*\*\*  $p=0.0007$ . Values represent means from 3 independent experiments  $\pm$  SEM.

# Supplementary Fig. 4

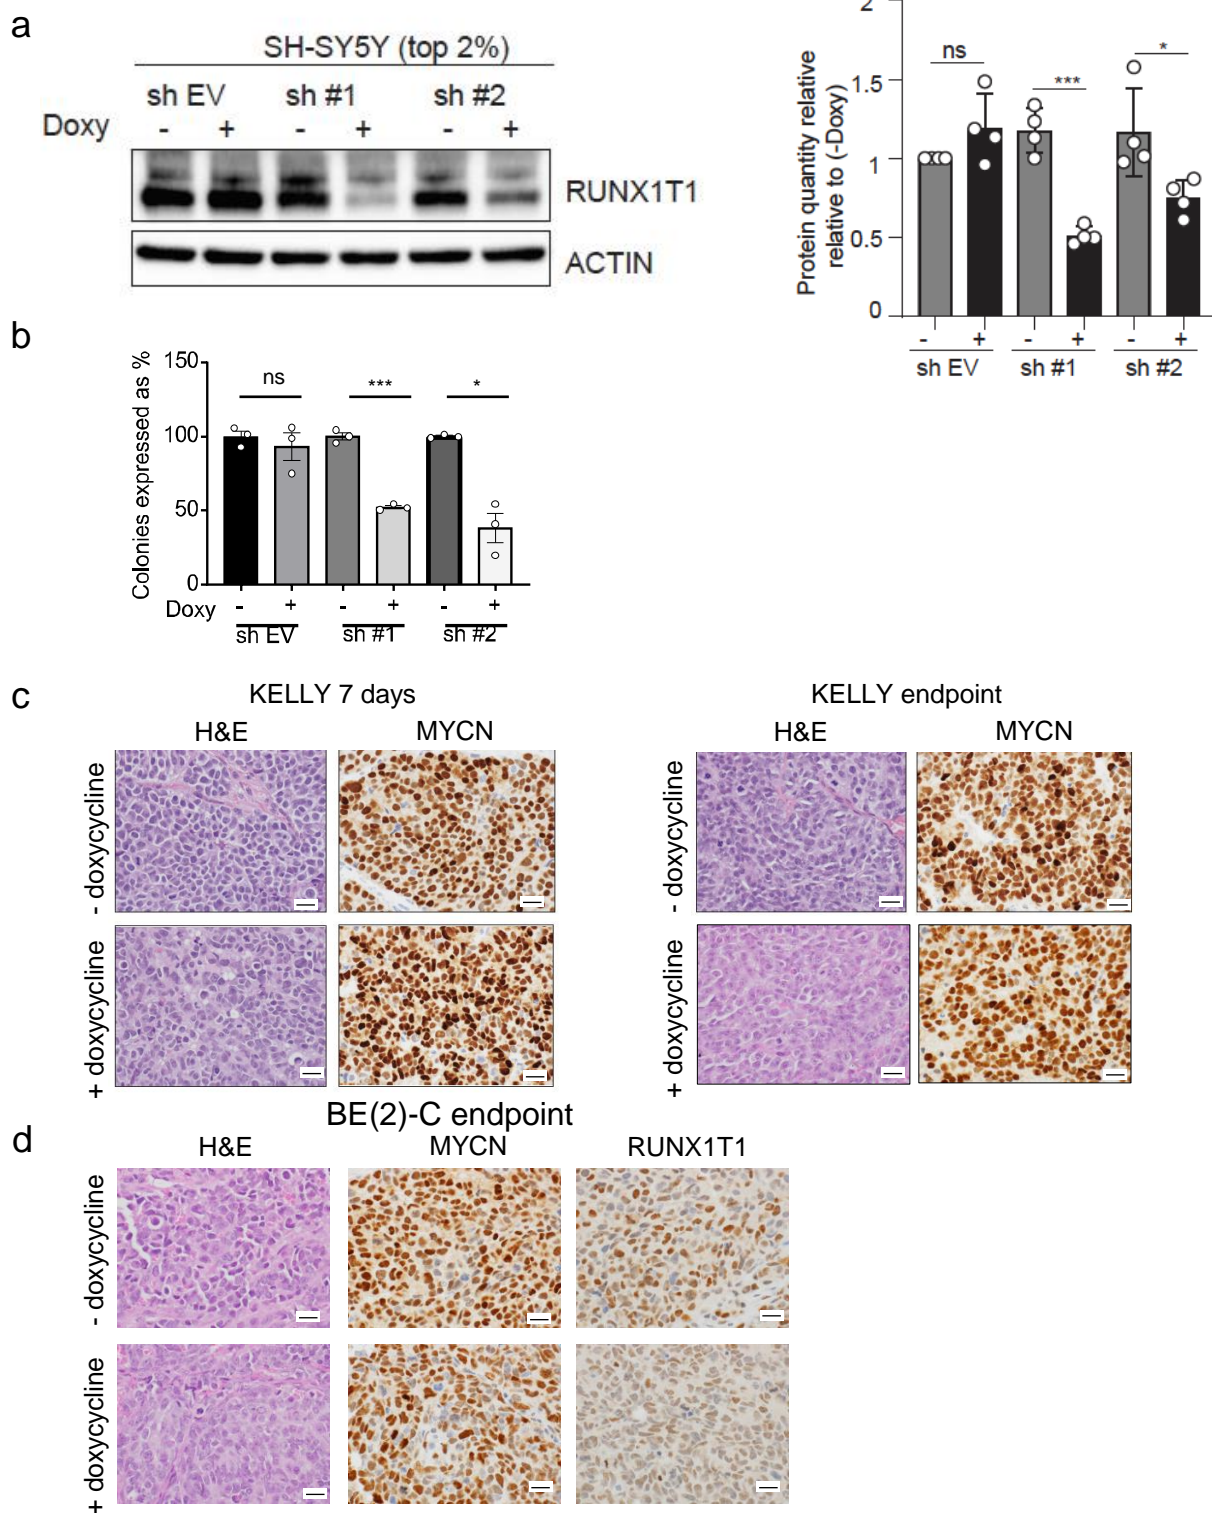

**Supplementary Fig. 4: Colony formation and histopathology staining following shRNA knockdown of RUNX1T1.** (a) RUNX1T1 knock down after 72hrs of doxycycline (1  $\mu\text{g}/\text{mL}$ ) treatment in SH-SY5Y cells, with two independent shRNA constructs (left panel). Quantitation from four independent experiments (right panel) demonstrated significantly decreased RUNX1T1 with shRNA#1 (\*\* $p=0.0001$ ) and shRNA#2 (\* $p=0.0327$ ). shEV ns  $p=0.1298$ . Two-tailed unpaired t-test. Values represent means from 4 independent experiments  $\pm$  SD. (b) Colony formation following doxycycline-induced knockdown of RUNX1T1 in SH-SY5Y cells, with two independent shRNA constructs. Colonies are represented as a percentage relative to the untreated control from three independent experiments. Quantitation demonstrated a significant decreases in colony number in shRNA#1 (\*\* $p=0.0001$ ) and shRNA#2 (\* $p=0.0327$ ). shEV ns  $p=0.1298$ . Two-tailed unpaired t-test. (c) Representative images of xenografted KELLY cells at 7 days post-doxycycline and end-point. Tumors are stained with H&E and MYCN. Scale bar 20 $\mu\text{m}$ . (d) Representative images of xenografted BE(2)-C tumor cells at end-point post-doxycycline treatment compared to vehicle control. Tissue samples were stained either with H&E or immunohistochemically for MYCN and RUNX1T1. Immunostaining for MYCN protein demonstrated similar strong nuclear staining in both cohorts. Reduced RUNX1T1 staining was observed in tumor cells.

# Supplementary Fig. 5

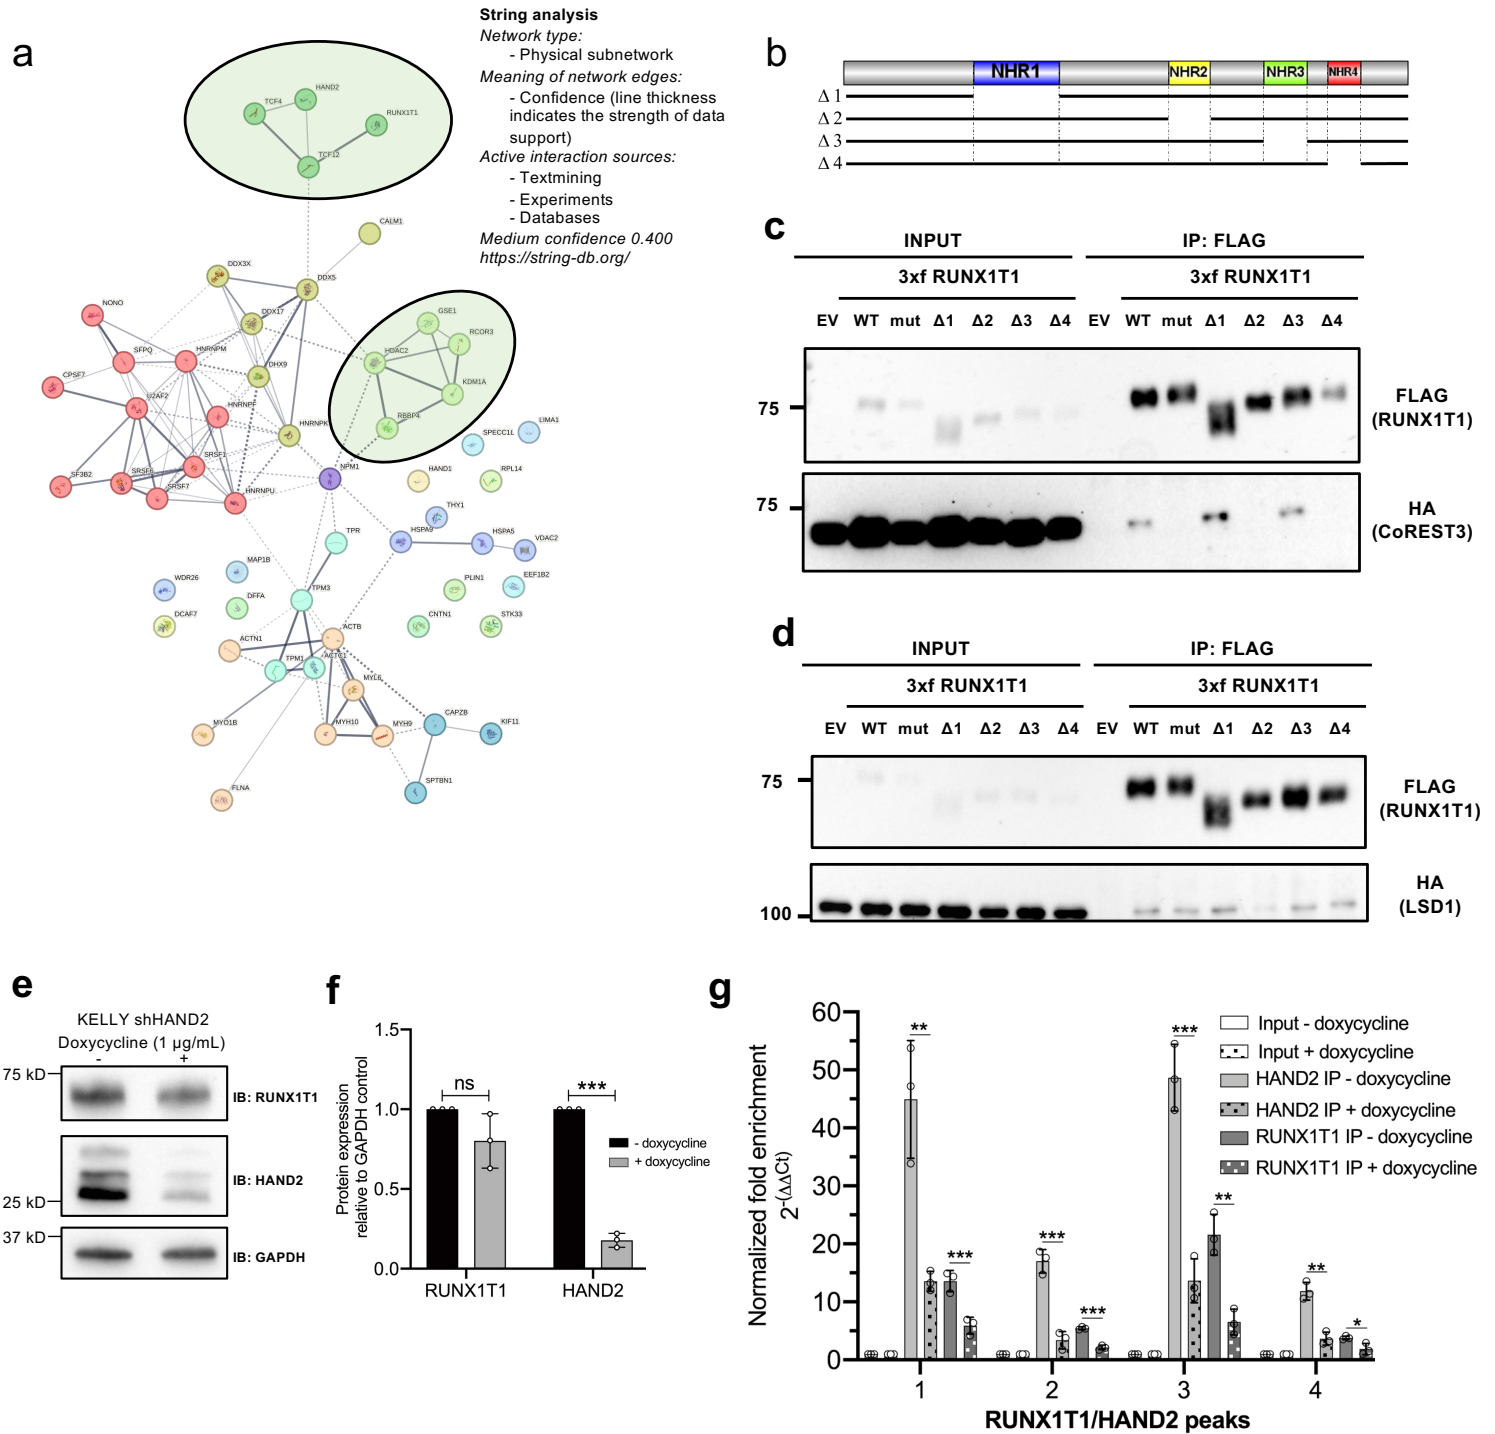

**Supplementary Fig. 5: RUNX1T1 forms part of an LCH repressor complex.** (a) String analysis performed following LC-MS/MS of FLAG-IP samples from BE(2)-C cells transiently (48 hrs) transfected with 3xFLAG-tagged wild type RUNX1T1. Clusters, identified by different colors are putative protein complexes based on published data. DNA binding transcription factors including HAND2 and epigenetic modifiers (HDAC2, KDM1A and RCOR3) are highlighted in the green circles. (b) graphical representation of the RUNX1T1 deletion mutants used. (c) (d) Individual deletion of each of the four RUNX1T1 NHR regions followed by Co-IP with either CoREST3/RCOR3 (c) or LSD1 (d). n=1 experiment. (e) HAND2 Knock-Down with shHAND2 after 72 hrs of doxycycline (1 μg/mL) treatment in KELLY cells. (f) normalized quantification (relative to GAPDH) from three independent experiments demonstrated significantly decreased HAND2 levels and no significant change in RUNX1T1 following shRNA-mediated HAND2 knockdown. Data are mean ± SD (n = 3 biological replicates; two-tailed unpaired t-test). \* p < 0.05; \*\* p < 0.01; \*\*\* p < 0.001. (g) RUNX1T1 and HAND2 ChIP-qPCR assays in KELLY cells with HAND2 Tet-inducible KD) cells following doxycycline treatment (1 μg/ml for 48 hrs). Input (white bars), HAND2 IP (light gray bars) and RUNX1T1 IP (dark grey bars) samples were analyzed by q-PCR using specific primers for Peak 1, 2, 3, 4 and ABCA10 TSS as negative control (Supplementary Table 7); dotted bars refers to HAND2 KD condition (+ doxycycline). Data are mean ± SD (n = 3 biological replicates; two-tailed unpaired t-test). \* p < 0.05; \*\* p < 0.01; \*\*\* p < 0.001.

# Supplementary Fig. 6

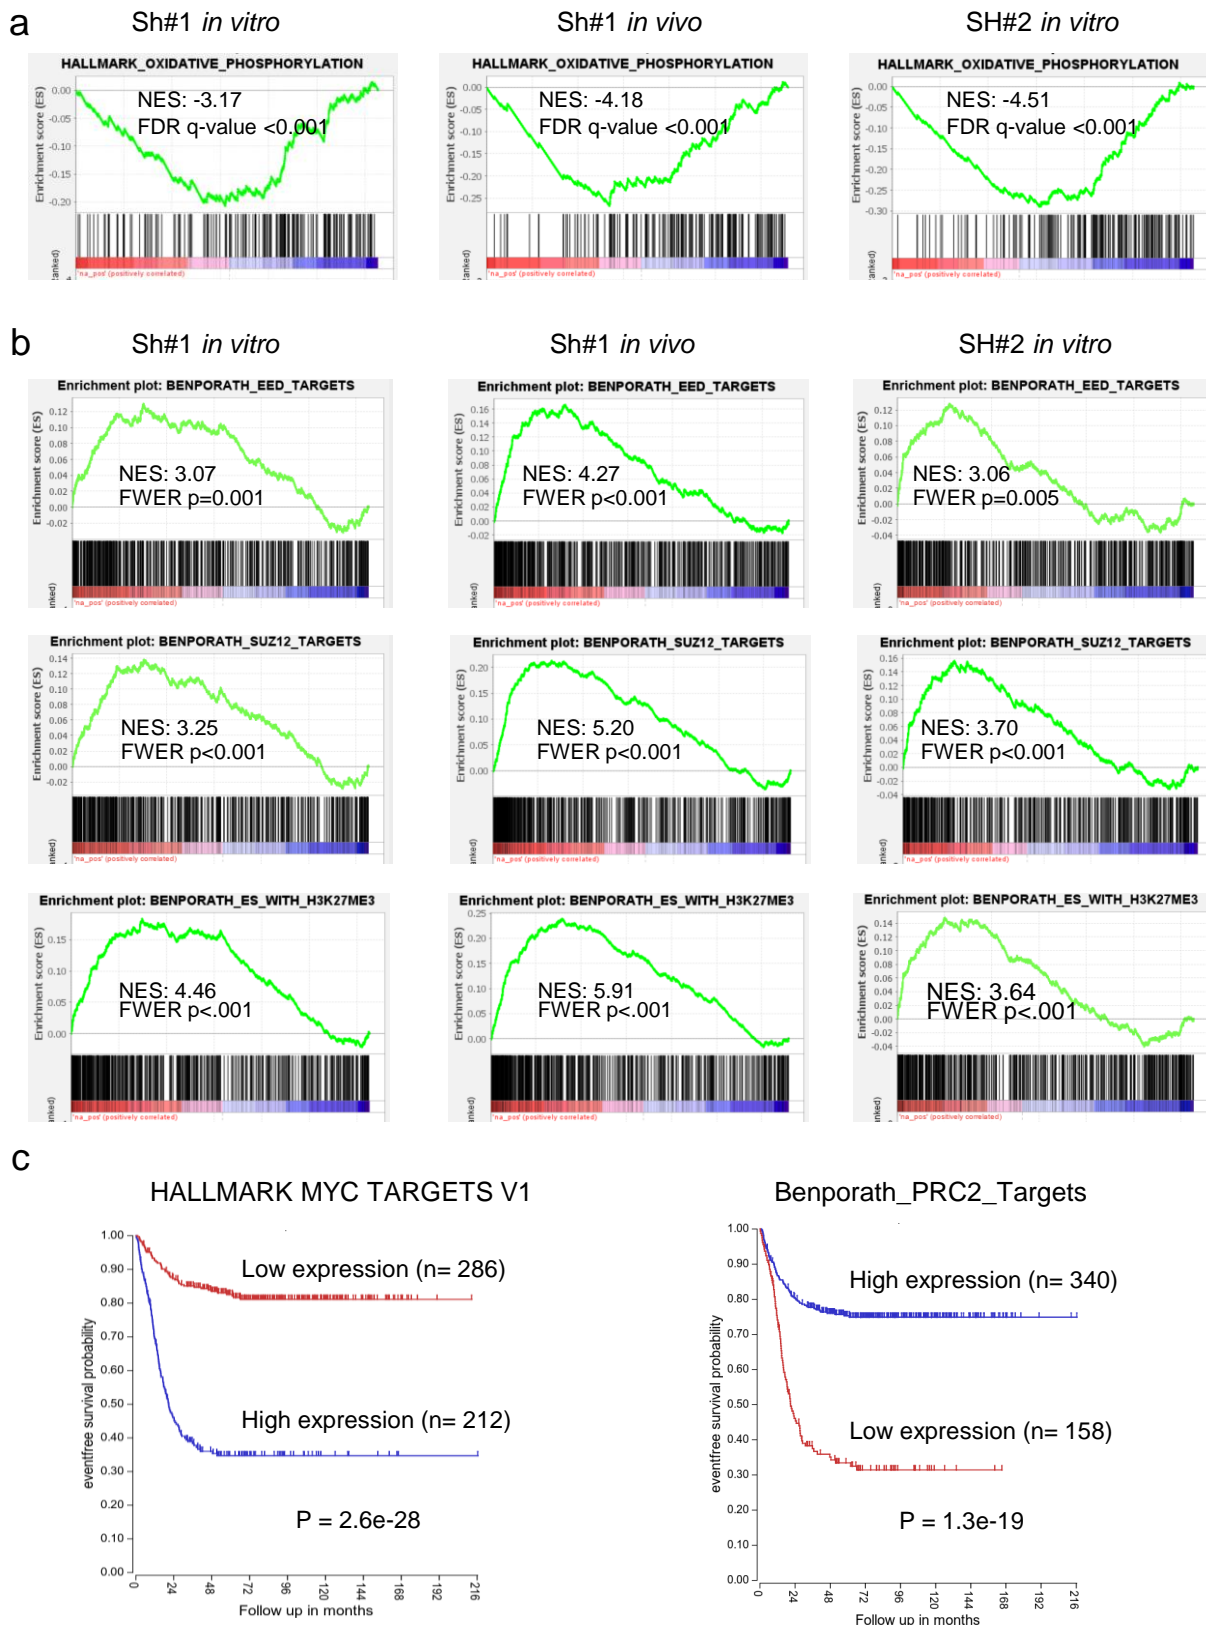

**Supplementary Fig. 6: RUNX1T1 depletion downregulates Hallmark oxidative phosphorylation genes and upregulates PRC2 component target genes.** (a) GSEA demonstrated significant downregulation in expression of Hallmark oxidative phosphorylation genes following *RUNX1T1* shRNA downregulation. (b) GSEA showed significant enrichment in expression of PRC2 subunit (*EED*, *SUZ12* and *H3K27me3*) target genes. (c) Kaplan-Meier analysis of GSEA enriched MYC and PRC2 target gene signatures in a publicly available RNAseq data set (SEQC) of tumor samples from the neuroblastoma R2 database showed high expression of MYC and low expression of the PRC2 signatures were highly prognostic of poor outcome.



# Supplementary Fig. 7

a

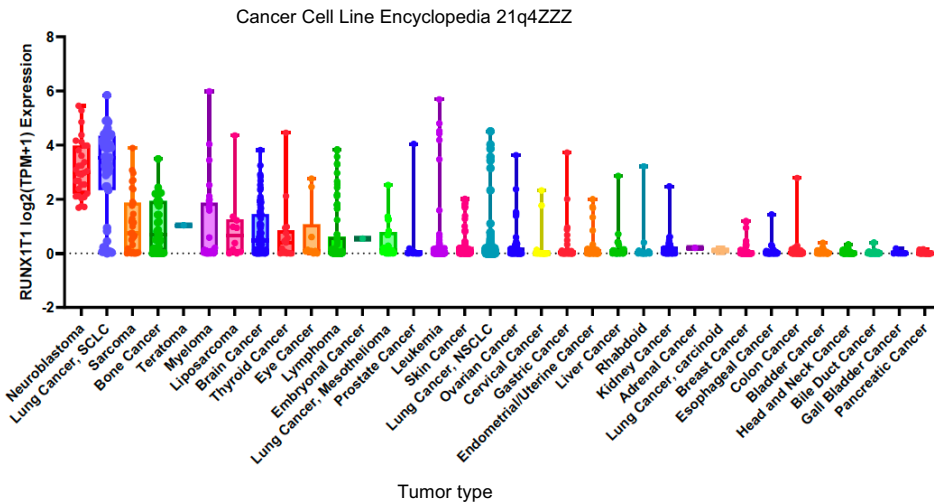

b

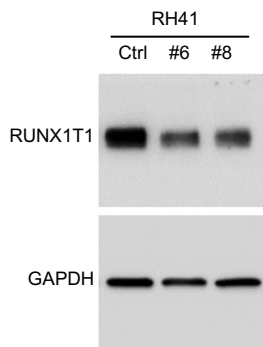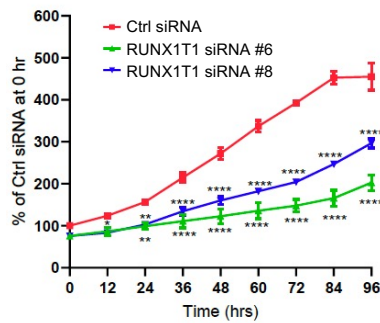

c

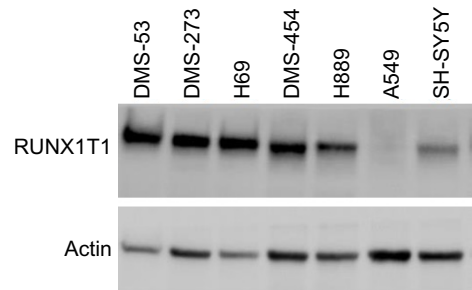

d

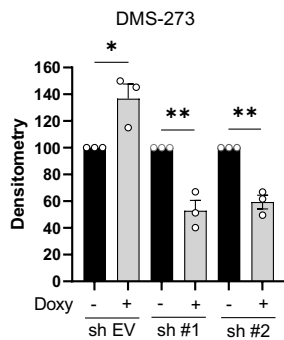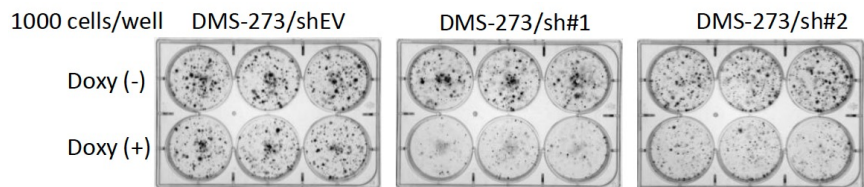

e

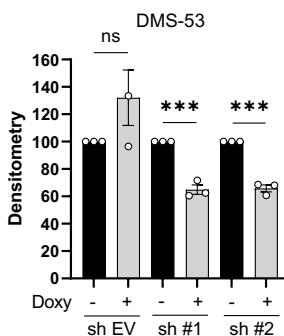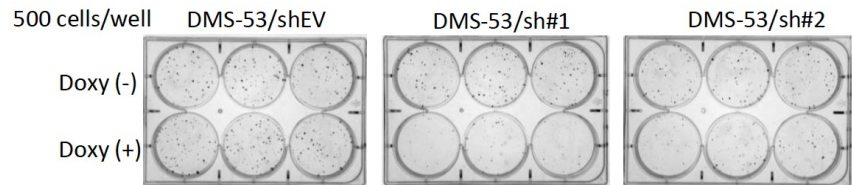

**Supplementary Fig. 7: RUNX1T1 loss reduces proliferation in alveolar rhabdomyosarcoma and clonogenic capacity in small cell lung cancer cells.** (a) Highest level of RUNX1T1 expression in neuroblastoma cell lines followed by SCLC and sarcoma lines in all tumor types in publicly available data from the Cancer Cell Line Encyclopedia (<https://depmap.org/portal/download/all/>). Box limits indicate 25th and 75th percentile with the central line marking the median value. The whiskers are minimum to maximum, and all points are shown. (b) Cell proliferation following knockdown of RUNX1T1 in RH41 rhabdomyosarcoma cells using two independent siRNA sequences. Values represent mean  $\pm$  SEM from three independent runs. Two-way ANOVA with Dunnett's multiple comparison test 24 hour control versus siRNA #6  $**p=0.0039$  and versus siRNA #8  $p=0.0038$ , 48-96 hours  $****p<0.0001$ . (c) Five SCLC cell lines (DMS- 53, DMS-273, DMS-454, H69, H889) demonstrated high level RUNX1T1 protein expression by comparison with the non- small cell lung cancer (A549) and neuroblastoma (SH-SY5Y) cells. We have run the Western blot of RUNX1T1 on these cell lines two times with similar results. (d) (e) Protein quantitation (left panels) and colony formation (right panels) following doxycycline-induced knockdown of RUNX1T1 in DMS-273 and DMS-53 SCLC cells, with two independent shRNA constructs. Quantitation of RUNX1T1 protein is expressed as mean  $\pm$ SD (n=3). Two-tailed unpaired t-test for DMS-273, shEV  $*p=0.0284$ , sh#1  $**p=0.0037$ , sh#2  $**p=0.0014$ ; for DMA-53, shEV ns=0.1879, sh#1  $***p=0.0005$ , sh#2  $***p=0.0002$ .

## Supplementary Table 1 Doxycycline-induced knockdown of RUNX1T1 in KELLY xenografts

| Sample ID* | Treatment   | Timepoint | Differentiation       | Morphology         | Ki67 (%)** | Fibrotic stroma*** |
|------------|-------------|-----------|-----------------------|--------------------|------------|--------------------|
| C1#1       | Control     | Day 7     | Poorly differentiated | Prominent nucleoli | 88         | ++                 |
| C1#2       | Control     | Day 7     | Undifferentiated      | Prominent nucleoli | 70         | +                  |
| C1#3       | Control     | Day 7     | Poorly differentiated | Prominent nucleoli | 87         | ++                 |
| C1#4       | Control     | Day 7     | Poorly differentiated | Prominent nucleoli | 77         | +++                |
| C2#1       | Doxycycline | Day 7     | Poorly differentiated | Prominent nucleoli | 43         | +                  |
| C2#2       | Doxycycline | Day 7     | Poorly differentiated | Prominent nucleoli | 47         | ++                 |
| C2#3       | Doxycycline | Day 7     | Poorly differentiated | Prominent nucleoli | 40         | ++                 |
| C2#4       | Doxycycline | Day 7     | Undifferentiated      | Prominent nucleoli | 60         | ++                 |
| C1#1       | Control     | Endpoint  | Undifferentiated      | Prominent nucleoli | 73         | +                  |
| C1#2       | Control     | Endpoint  | Poorly differentiated | Prominent nucleoli | 70         | +                  |
| C1#3       | Control     | Endpoint  | Undifferentiated      | Prominent nucleoli | 73         | +                  |
| C1#4       | Control     | Endpoint  | Poorly differentiated | Prominent nucleoli | 75         | ++                 |
| C1#5       | Control     | Endpoint  | Poorly differentiated | Prominent nucleoli | 73         | +                  |
| C2#1       | Doxycycline | Endpoint  | Poorly differentiated | Prominent nucleoli | 63         | +                  |
| C2#2       | Doxycycline | Endpoint  | Poorly differentiated | Prominent nucleoli | 70         | +                  |
| C2#3       | Doxycycline | Endpoint  | Poorly differentiated | Prominent nucleoli | 50         | +                  |
| C2#4       | Doxycycline | Endpoint  | Poorly differentiated | Prominent nucleoli | 67         | +                  |
| C2#5       | Doxycycline | Endpoint  | Poorly differentiated | Prominent nucleoli | 67         | +                  |
| C3#1       | Control     | Endpoint  | Poorly differentiated | Prominent nucleoli | 70         | ++                 |
| C3#2       | Control     | Endpoint  | Poorly differentiated | Prominent nucleoli | 67         | +                  |
| C3#3       | Control     | Endpoint  | Poorly differentiated | Prominent nucleoli | 83         | +                  |
| C3#4       | Control     | Endpoint  | Undifferentiated      | Prominent nucleoli | 70         | +                  |
| C3#5       | Control     | Endpoint  | Undifferentiated      | Prominent nucleoli | 63         | +                  |
| C4#1       | Doxycycline | Endpoint  | Poorly differentiated | Prominent nucleoli | 73         | +                  |
| C4#2       | Doxycycline | Endpoint  | Poorly differentiated | Prominent nucleoli | 67         | +                  |
| C4#3       | Doxycycline | Endpoint  | Poorly differentiated | Prominent nucleoli | 57         | +                  |
| C4#4       | Doxycycline | Endpoint  | Poorly differentiated | Prominent nucleoli | 70         | +                  |
| C4#5       | Doxycycline | Endpoint  | Poorly differentiated | Prominent nucleoli | 67         | +                  |

\* C1#1, C1#2 etc, refers to cage number and individual mouse within that cage.

\*\* The Ki67 proliferative index (%) was determined by visually estimating the % of viable tumour cells with Ki67 nuclear staining, to the nearest 10%, in tissue microarray cores. Two or three cores were available for assessment for all tumors except C2#4 Day 7 for which only a single core was available. When multiple cores were assessed from the same tumor sample, the values were averaged.

\*\*\* Semi-quantitative assessment of extent of fibrocollagenous connective tissue in xenografts where: + <10%; ++ 11-50%; +++ >50%

**Supplementary Table 2** Primers and probes used in real-time PCR analysis for mouse genotyping

| Gene                                       | Primer/<br>Probe                       | Sequence                               |
|--------------------------------------------|----------------------------------------|----------------------------------------|
| <i>Th-MYCN</i>                             |                                        |                                        |
| <b>MYCN</b>                                | <i>MYCN</i> F                          | 5'-CGACCACAAGGCCCTCAGTA                |
|                                            | <i>MYCN</i> R                          | 5'-CAGCCTTGGTGTGGAGGAG                 |
|                                            | Probe                                  | 6FAM-CGCTTCTCCACAGTGACCACGTCG TAMRA    |
| <b>Chr 18*</b>                             | Chr 18 F                               | 5'- CCACAAAAATATGACTTCCTAAAAGATTT      |
|                                            | Chr 18 R                               | 5'- CATGGGACTTCCTCCTTATATGCT           |
|                                            | Probe                                  | VIC-5'-AACAATTATAACACCATTAGATATG TAMRA |
| <b><i>Runx1t1</i> Knock-out genotyping</b> |                                        |                                        |
| <b><i>Runx1t1</i></b>                      | <i>Runx1t1</i> F                       | 5'-TGAAGACGCAGTCTAGGCTGACT             |
|                                            | <i>Runx1t1</i> R                       | 5'-TACTTACATGTCGTTGGCGTAAATG           |
|                                            | Probe                                  | 6FAM 5'-CAATGCCACCTCCTC MGB-NFQ†       |
| <b><i>lacZ</i></b>                         | <i>lacZ</i> F                          | 5'-CAGAAACAGCACCTCGAACTGA              |
|                                            | <i>lacZ</i> R                          | 5'-GCCATACAGCGCGTTGAAA                 |
|                                            | Probe                                  | VIC-5'-CCGCGATATTGCC MGB-NFQ           |
| <b><i>Runx1t1</i> #1590 SNV</b>            |                                        |                                        |
| <b>#1590 Forward</b>                       | 5'-GACGTGCAGCGGCTGTAA                  |                                        |
| <b>#1590 Reverse</b>                       | 5'-CCCAGTCTTTATGCTGGCAA                |                                        |
| <b>WT Probe</b>                            | VIC-5'-ACGGCCCGA <u>T</u> ACT MGB-NFQ† |                                        |
| <b>Variant Probe</b>                       | 6FAM-5'-ACGGCCCGA <u>C</u> ACT MGB-NFQ |                                        |

\* Chr indicates Chromosome

† MGB-NFQ refers to minor groove binder–non fluorescent quencher

**Supplementary Table 3** Primers for expression assays

| <b>Primer Name</b>   | <b>Sequence 5'-3'</b> |
|----------------------|-----------------------|
| Mm <u>gusb</u> F     | TGGCTGGGTGTGGTATGAAC  |
| Mm <u>gusb</u> R     | TCCATTACCCACACAAC     |
| mRUNX1t1 all F       | AGGCGAACTCCAGACAGAAC  |
| mRUNX1t1 all R       | AATAGTGCATGGTCGCTTGC  |
| h MYCN qPCR F        | CACAAGGCCCTCAGTACCTC  |
| h <u>MYCN</u> qPCR R | ACCACGTCGATTTCTTCCTC  |
| h GUSB <u>Fw</u>     | TGGTGCGTAGGGACAAGAAC  |
| h GUSB RV            | CCAAGGATTTGGTGTGAGCG  |
| Hs_Runx1t1_All_F     | AGTTGCACTAGACGCGCA    |
| Hs_Runx1t1_All_R     | TGGCGCTTCACCTCATTGAC  |

**Supplementary Table 4** Primers used to create 5'UTR RUNX1T1 constructs

| <b>Primer Name</b> | <b>Sequence 5'-3'</b>             |
|--------------------|-----------------------------------|
| m5UTR_ iso1 F H3   | AAAAGCTTCCTGATGCACGTTGGCTCCTCTCC  |
| m5UTR_ iso1 R H3   | AAAAGCTTtctccagcaagecgtgtgctaac   |
| m5UTR_ iso2 F H3   | AAAAGCTTGAGGGCGGGCGAGGCGGAC       |
| m5UTR_ iso2 R H3   | AAAAGCTTCCGCCGCGGGCTCCCAGC        |
| m5UTR_ iso3 F H3   | AAAAGCTTCTGGAAC TGGGGCAGGAGGAAGAG |
| m5UTR_ iso3 R H3   | AAAAGCTTcccggaatccagcgtgtaacacac  |

**Supplementary Table 5** Sequence of oligos used to create RUNX1T1 shRNA constructs

| Primer Name                              | Sequence 5'-3'                                                                      |
|------------------------------------------|-------------------------------------------------------------------------------------|
| shRNA#1 <i>RUNX1T1</i><br>Ambion Forward | <b>TCCCGGTT</b> <i>CCTTACTACCCTGCATTCAAGAGATGCAGGGT</i><br><i>AGTAAGGAACCTTTTTC</i> |
| shRNA#1 <i>RUNX1T1</i><br>Ambion Reverse | <i>TCGAGAAAAAGGTT</i> <b>CCTTACTACCCTGCATCTCTTGAATG</b><br><b>CAGGGTAGTAAGGAACC</b> |
| shRNA#2 <i>RUNX1T1</i><br>Forward        | <b>TCCCAAGCAAGCGACCATGCACTATTTCAAGAGAATAGTG</b><br><i>CATGGTCGCTTGCTTTTTC</i>       |
| shRNA#2 <i>RUNX1T1</i><br>Reverse        | <i>TCGAGAAAAAAGCAAGCGACCATGCACTATTCTCTTGA</i><br><b>AATAGTGCATGGTCGCTTGCTT</b>      |
| shRNA <i>HAND2</i><br>Forward            | <b>TCCCTCAAGAAGACCGACGTGAAAGCTCGAGCTTTCACGT</b><br><b>CG GTCTTCTTGATTTTTC</b>       |
| shRNA <i>HAND2</i><br>Reverse            | <i>TCGAGAAAAAATCAAGAAGACCGACGTGAAAGCTCGAGC</i><br><b>TTTCACGTCGGTCTTCTTGA</b>       |

Bases in Bold: sense or passenger (same as transcript)

Bases in Italics: antisense or guide (real siRNA)

**Supplementary Table 6** Primers used to create mutant RUNX1T1 constructs

| Primer Name                                                 | Sequence 5'-3'                         |
|-------------------------------------------------------------|----------------------------------------|
| Forward containing <i>NotI</i><br>sequence (in bold)        | <b>AAGCGGCCGCTCTGTCAAAAGAAACACTTGG</b> |
| Reverse containing <i>BamHI</i><br>sequence (in bold)       | <b>AAGGATCCCTAGCGAGGCGTCGTCTCTATG</b>  |
| Forward <i>Runx1t1</i> Mutant<br>(YH) (mutant base in bold) | <b>CACTGTGGCTCTTTTGGCCAGC</b>          |
| Reverse <i>Runx1t1</i> Mutant (YH)                          | <b>TCGGGCCGTGTTACAGCCGCTG</b>          |

**Supplementary Table 7** Primers for Max ChIP-qPCR assays

| <b>Primer Name</b> | <b>Sequence 5'-3'</b>         |
|--------------------|-------------------------------|
| GSPT1 Fw           | TTCGCTCGGTAGTTCTCTG           |
| GSPT1 Rev          | TGTCCCTGAACTTCGACTCC          |
| CLNS1A Fw          | ACCCCGGAAGAACAACCTTAG         |
| CLNS1A Rev         | GCCGCTTTTCCTAGAATGTC          |
| NAP1L1 Fw          | AGTTTGAAACCCAGGGACAG          |
| NAP1L1 Rev         | CCTCGGTCTGTGCTTACTTTG         |
| ABCA10 Fw          | AGCAACATCACCAACCTTATATTTCCC   |
| ABCA10 Rev         | TTAGTCAGTAAACACTCACTCAGTAAAGC |
| RUNX1T1 peak1 Fw   | ACTTGCACAAACCAGAGCTG          |
| RUNX1T1 peak1 Rv   | AGGACTTCCGCCTTGTAATGAC        |
| RUNX1T1 peak2 Fw   | AGGGCGTCATCCTCTTCTTG          |
| RUNX1T1 peak2 Rv   | TGGCCAGGCTTTTATTGTGC          |
| RUNX1T1 peak3 Fw   | AATCCCAACCCCCGCATATG          |
| RUNX1T1 peak3 Rv   | AAGGCTGCATGGAGAAAAGC          |
| RUNX1T1 peak4 Fw   | CACACACACACATACACACCAC        |
| RUNX1T1 peak4 Rv   | CTGCCACGAGAGCTACAAG           |

## Supplementary Table 8 Antibodies used

| Protein                | Catalogue # | Company                                        | Host               | Application | Dilution               |
|------------------------|-------------|------------------------------------------------|--------------------|-------------|------------------------|
| MAX (S-20)             | #4739S      | Cell Signalling                                | Rabbit monoclonal  | WB          | 1:500                  |
| MXD1                   | 19547-1-AP  | Proteintech                                    | Rabbit, polyclonal | WB          | 1:500                  |
| MXD2                   | A12098      | Abclonal                                       | Rabbit, polyclonal | WB          | 1:2000                 |
| MXD3                   | 249041      | United States Biological/Assay Matrix Pty Ltd. | Mouse, polyclonal  | WB          | 1:500                  |
| MXD4                   | ab220495    | Abcam                                          | Rabbit, polyclonal | WB          | 1:1000                 |
| MGA (MXD5)<br>MGA6A4H5 | sc-81105    | Santa Cruz/Bio-Strategy PTY Limited            | Mouse monoclonal   | WB          | 1:250                  |
| MNT(MXD6)              | MBS9606130  | MyBioSource, Inc/Jomar Life Research           | Rabbit, polyclonal | WB          | 1:1000                 |
| MLX(MXD7) (F-12)       | sc-393086   | Santa Cruz                                     | Mouse monoclonal   | WB          | 1:300                  |
| RUNX1T1                | 15494-1-AP  | Proteintech                                    | Rabbit, polyclonal | WB          | 1:1000                 |
| RUNX1T1                | 15494-1-AP  | Proteintech                                    | Rabbit, polyclonal | IHC         | 1:400                  |
| MYCN (B8.4.B)          | sc-53993    | Santa Cruz                                     | Mouse monoclonal   | WB          | 1:1000                 |
| MYCN (NCM II 100)      | ab16898     | Abcam                                          | Mouse monoclonal   | IHC         | 1:200 (TMA)            |
| MYCN                   | 10159-2-AP  | Proteintech                                    | Rabbit, polyclonal | IHC         | 1:1000 (mouse tissues) |
| B-III Tubulin          | 802001      | Biolegend                                      | Rabbit, polyclonal | IF          | 1:1000                 |
| GAPDH (G-9)            | sc-365062   | Santa Cruz                                     | Mouse monoclonal   | WB          | 1:5000                 |
| ACTIN                  | A2066       | Sigma-Aldrich                                  | Rabbit, polyclonal | WB          | 1:5000                 |
| FLAG (M2)              | F3165       | Sigma-Aldrich                                  | Mouse monoclonal   | Co-IP       | 1.5ug                  |
| MYCN (B8.4.B)          | sc-53993    | Santa Cruz                                     | Mouse monoclonal   | Co-IP       | 2ug                    |
| IgG                    | sc-2025     | Santa Cruz                                     | Mouse monoclonal   | Co-IP       | 2ug                    |
| HAND2                  | EPR19451    | Abcam                                          | Rabbit Monoclonal  | Co-IP       | 1:1000                 |
| Anti-HA                | ab9110      | Abcam                                          | Rabbit Polyclonal  | Co-IP       | 1:3000                 |

Source data for Supp Figure 1 can be found with Figure 1

Source data for Supp Figure 2a: Hyperplastic ganglia of 1590 cohort can be found with Figure 2a and 2b



# Source Data

## Supp Figure 2b

### Th-MYCN Runx1t1 WT and YH RUNX1T1 and ACTIN

Run

11/01/2018

Densitometry used 4 brains from different animals

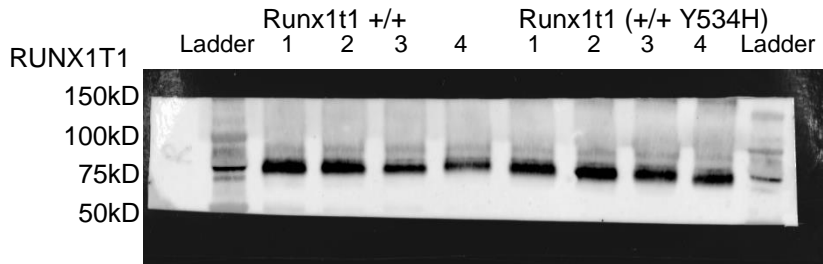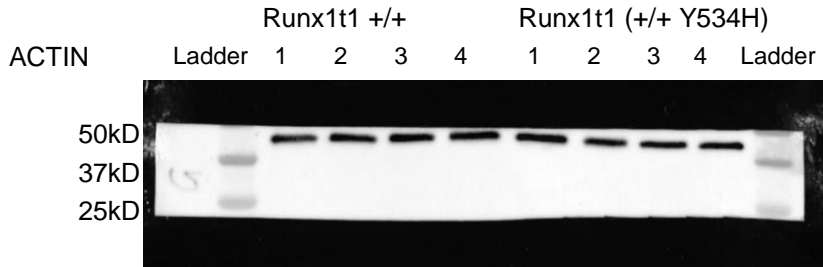

**Supp Figure 3a**

**Kelly time course 0-72 hours, Control shEV and RUNX1T1 sh#1**

Run 5/10/2017

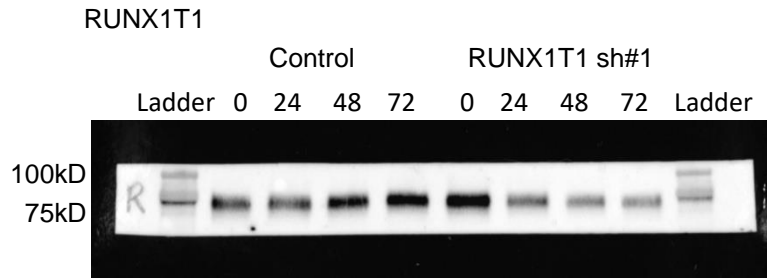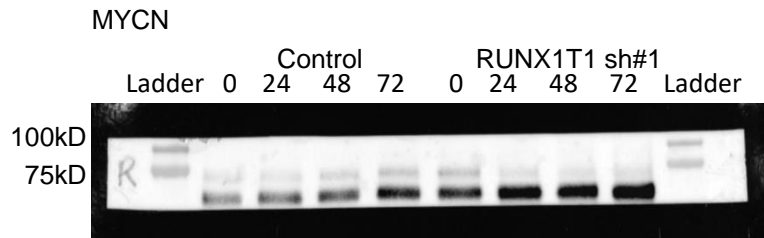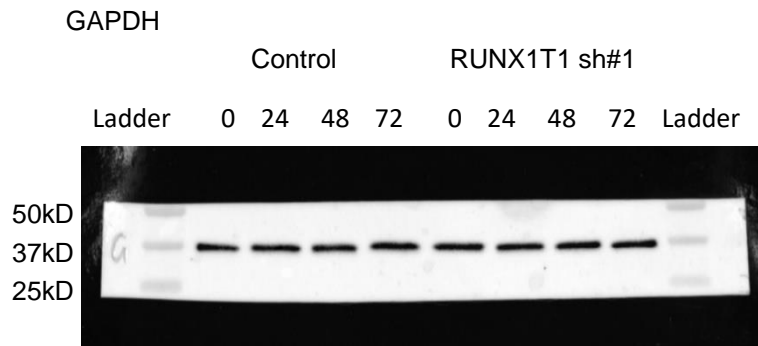

**Supp Figure 3a continued**

**Kelly time course 0-72 hours, Control shEV and RUNX1T1 sh#1 4/08/2023**

Note: Samples in gel#1 and gel#2 are from two independent experiments  
Run 2 and 3

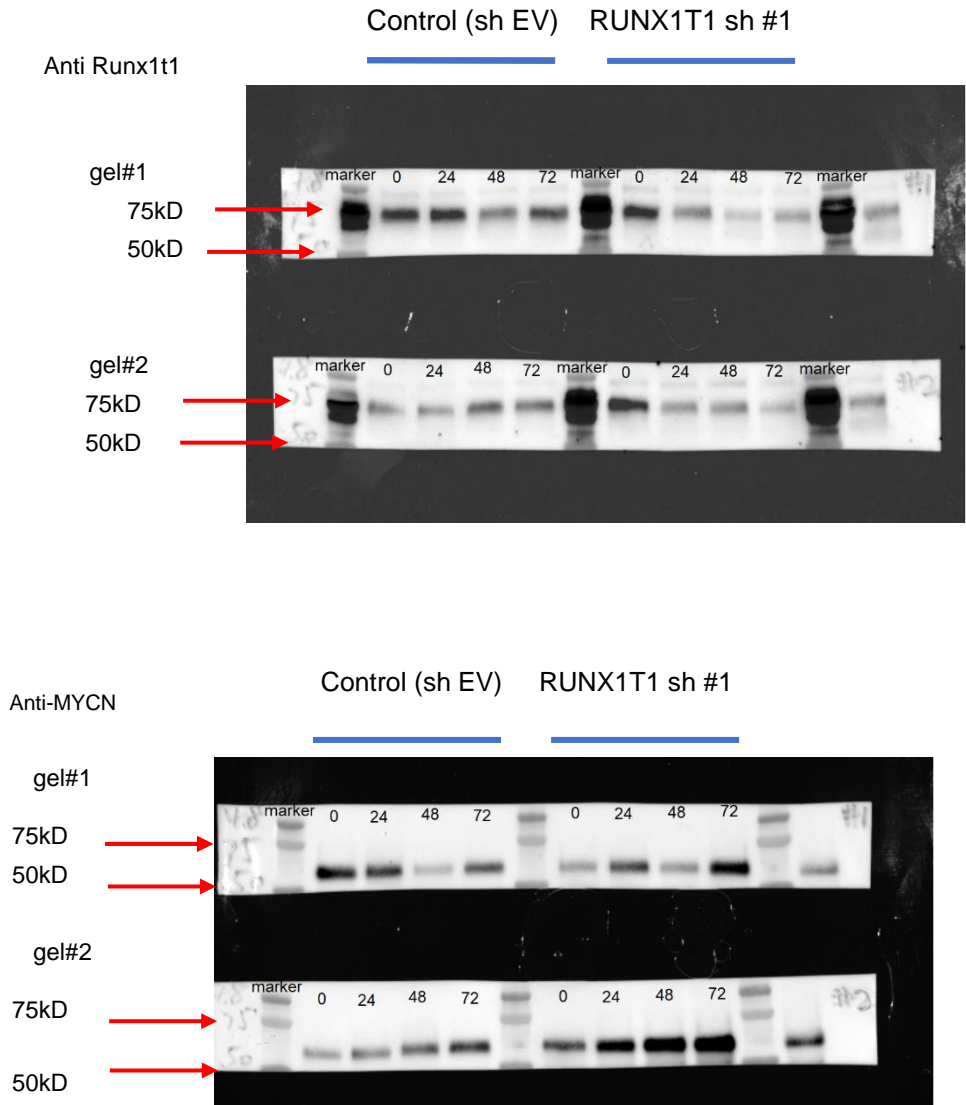

**Supp Figure 3b**  
**KELLY +/- Dox Control, sh1, Hela MAX and GAPDH**

22/11/2021

gel#1

Kelly cells

SH-SY5Y

Anti-Max

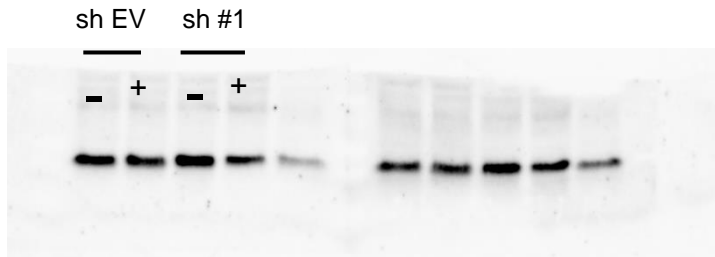

Anti-GAPDH

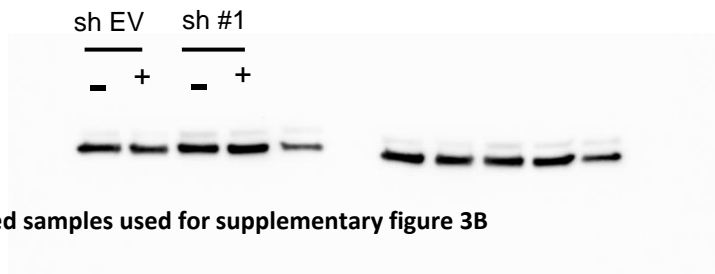

Labelled samples used for supplementary figure 3B

22/11/2021

gel#1

Merged with protein marker

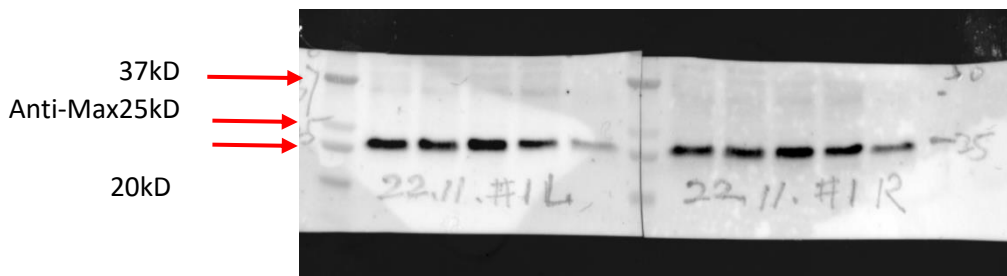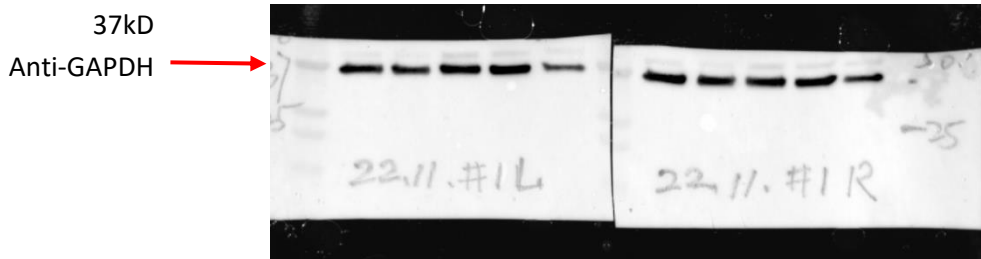

**Supp Figure 3b continued**  
**KELLY +/- Dox Control, sh1, HeLa MAX and GAPDH**

7/12/2021  
**gel#1**

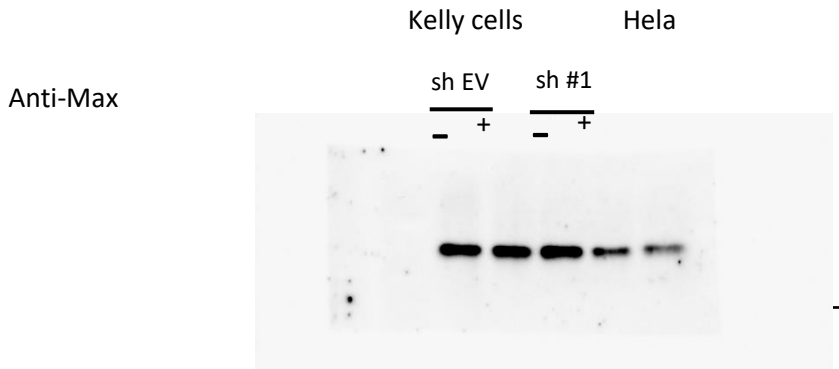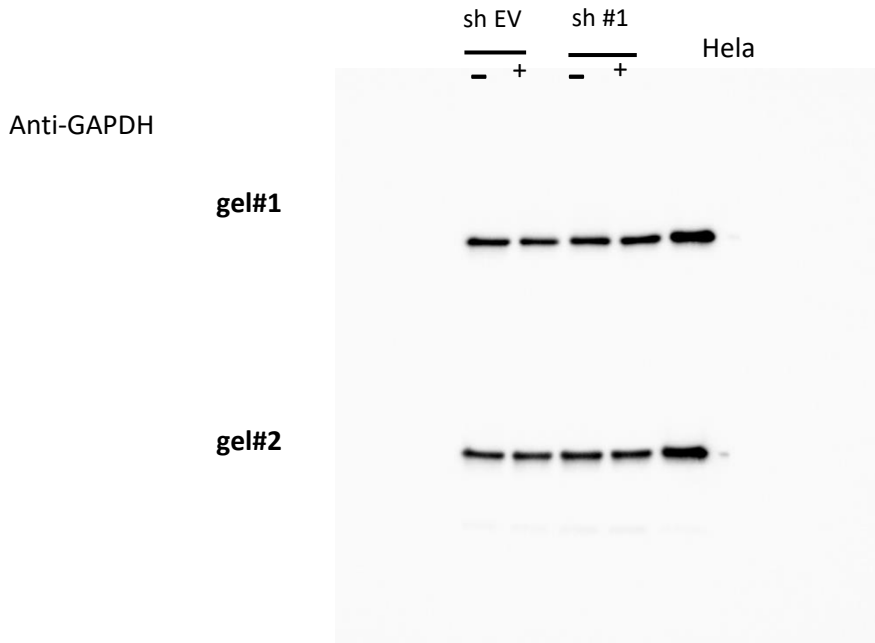

**Note: gel#1 used for supplementary figure 3B**

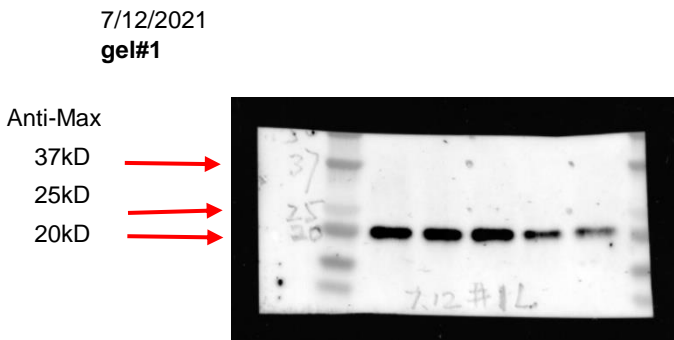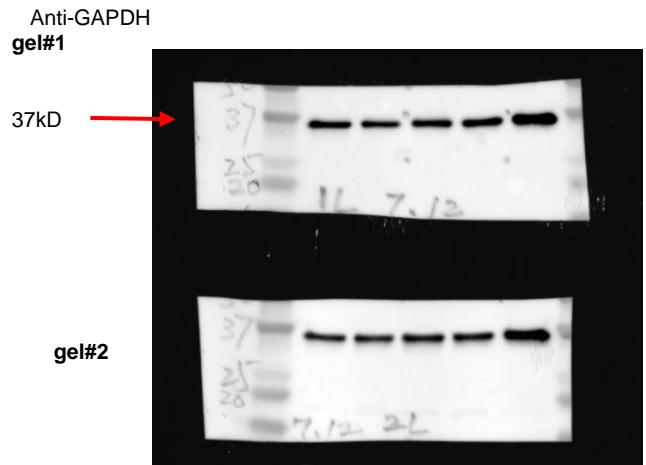

Merged with protein marker

# Supp Figure 3c MAX binding partners

## RUNX1T1

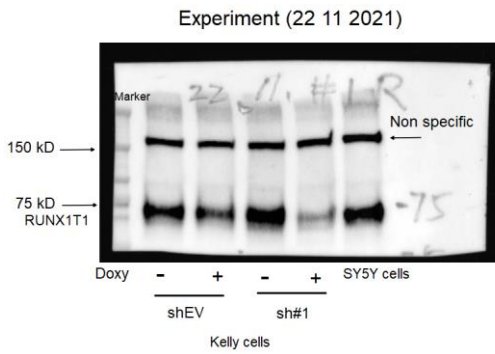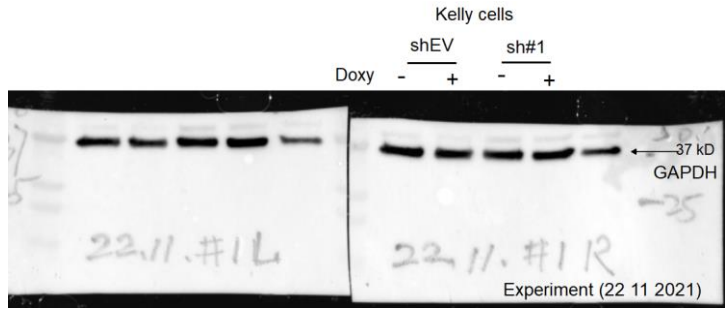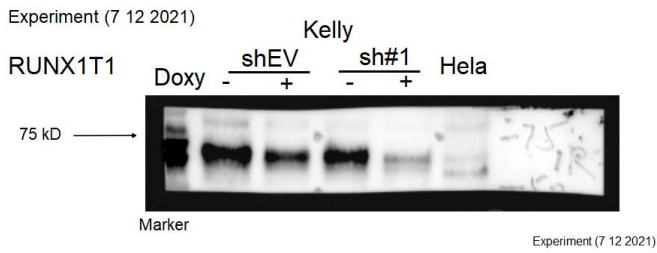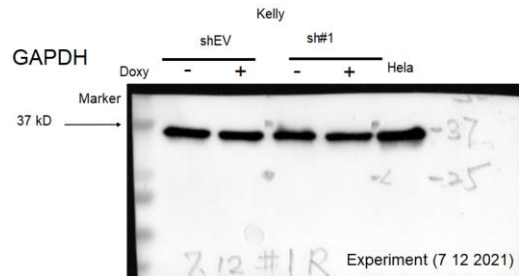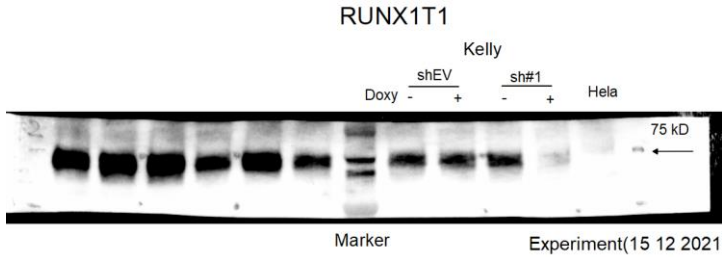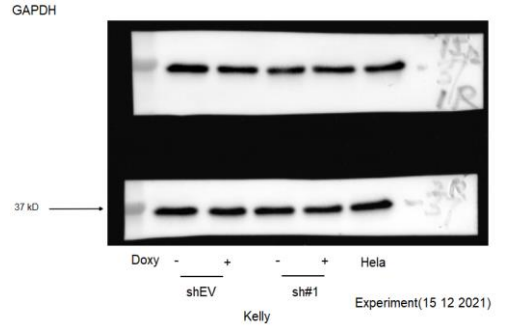

Supp Figure 3c continued  
MAX binding partners

MXD1

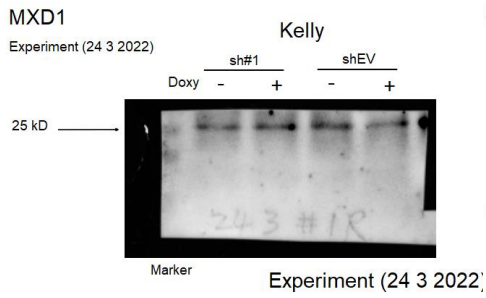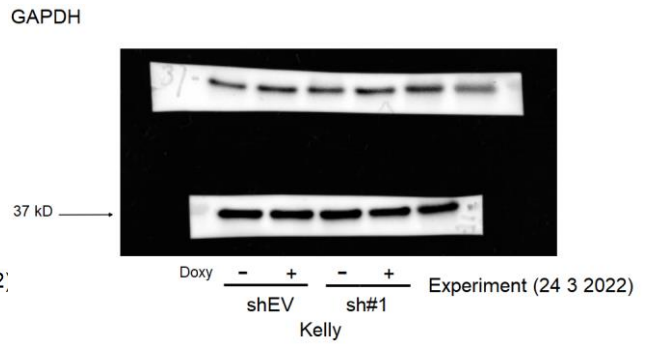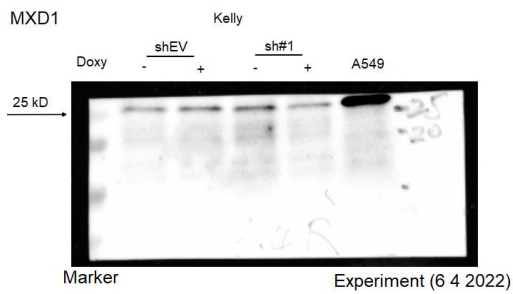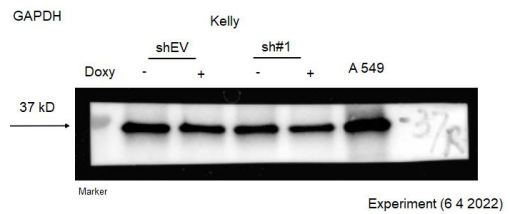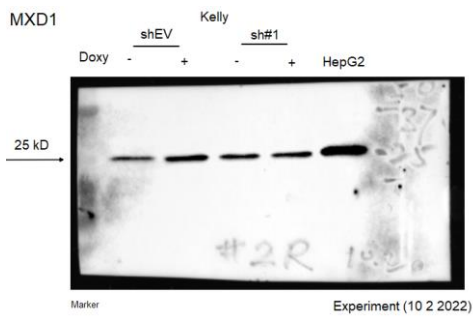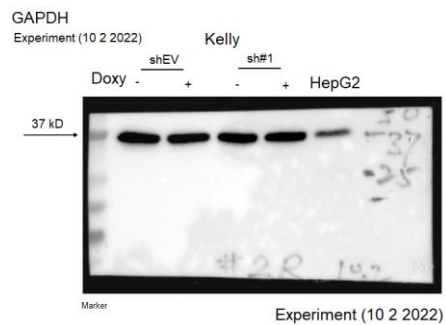

**Supp Figure 3c continued**  
**MAX binding partners**

**MXD2**

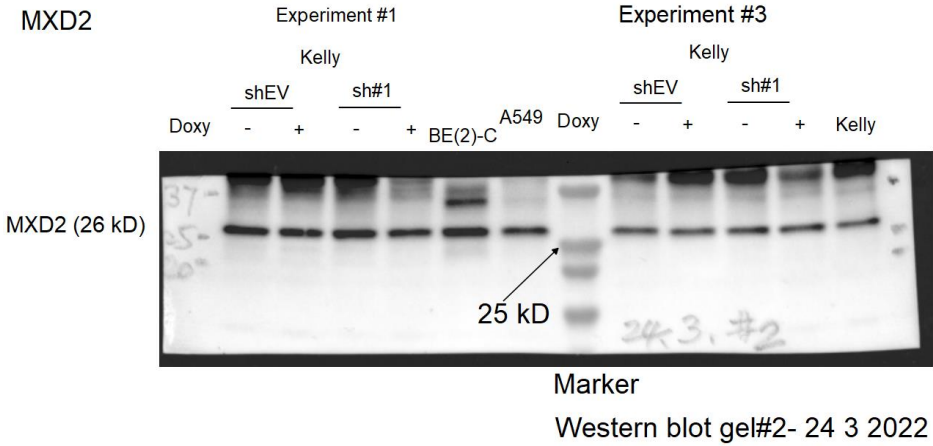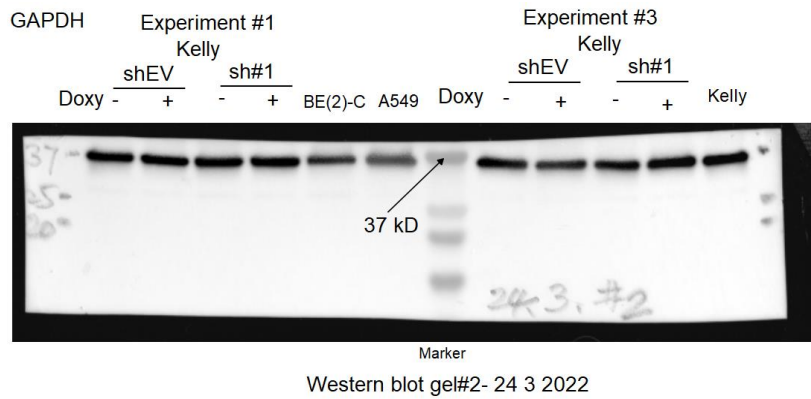

Experiment#2

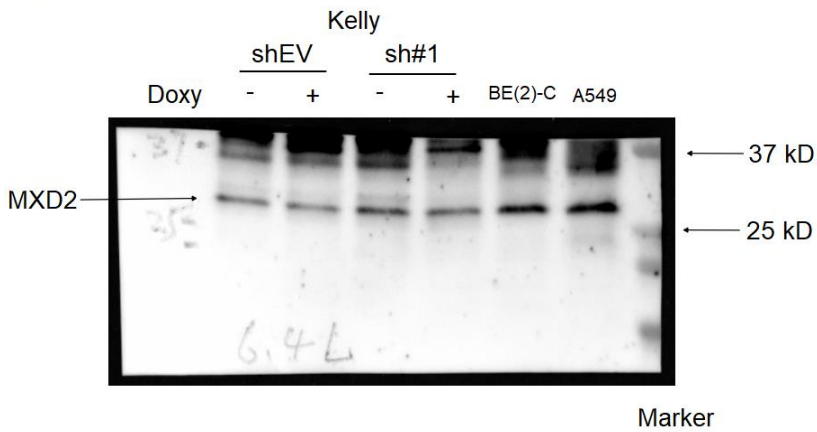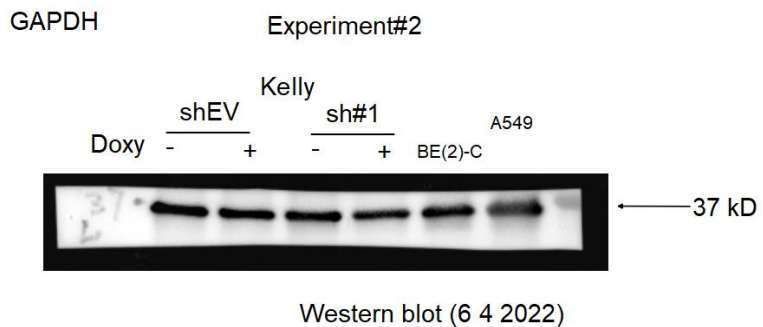



**Supp Figure 3c continued**  
**MAX binding partners**

**MXD3**

MXD3 (25kD)

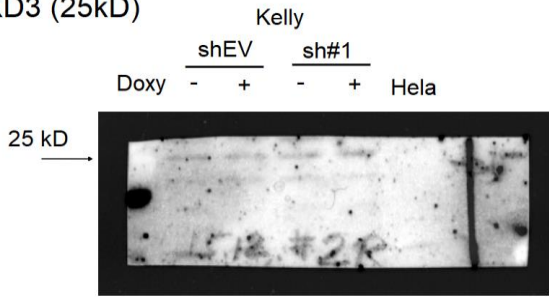

15 12 2021

GAPDH

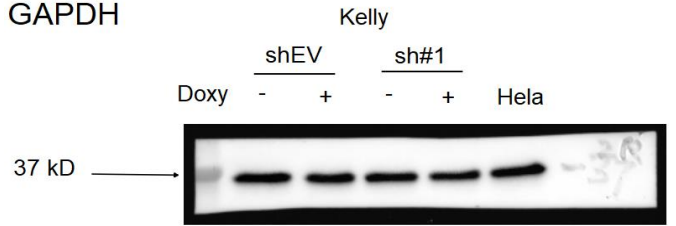

15 12 2021

MXD3 (25kD)

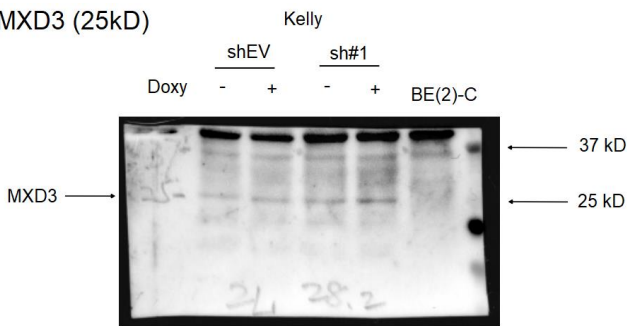

28 02 2022

GAPDH  
28 02 2022

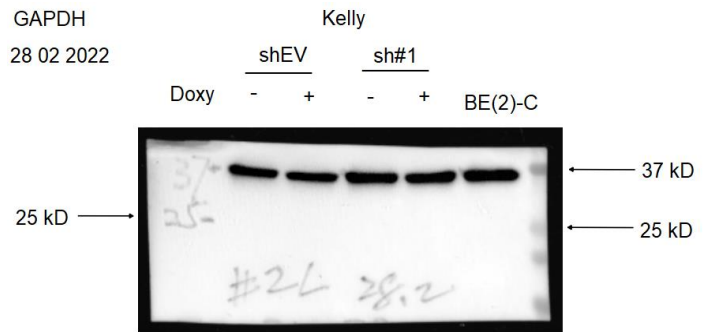

28 02 2022

MXD3 (25kD)

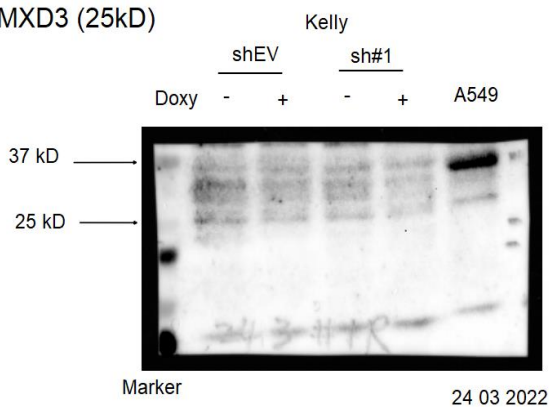

24 03 2022

GAPDH

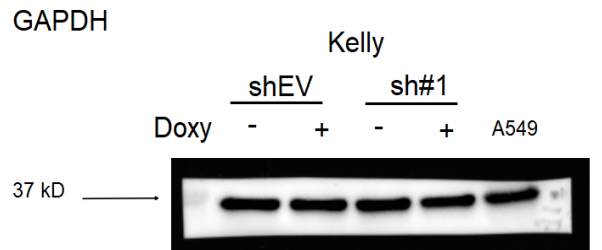

24 03 2022

**Supp Figure 3c continued**  
**MAX binding partners**

**MXD4**

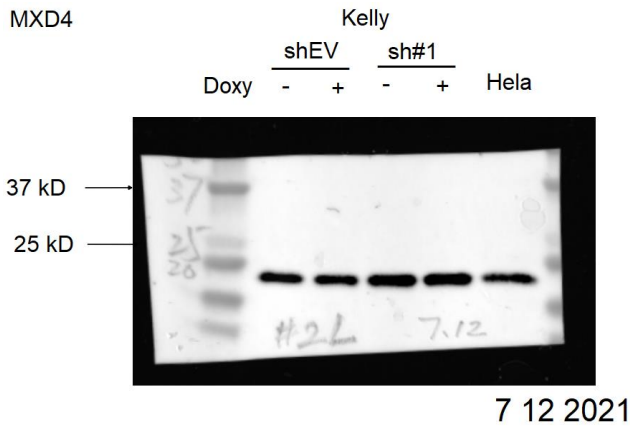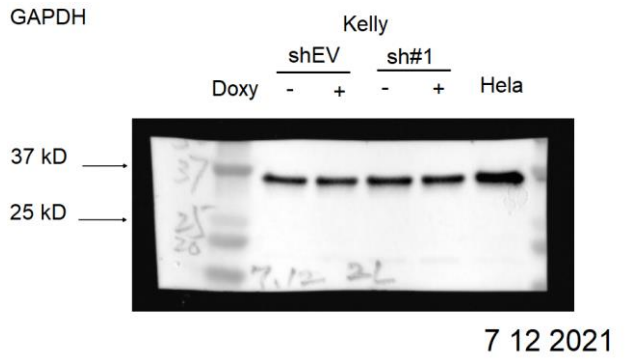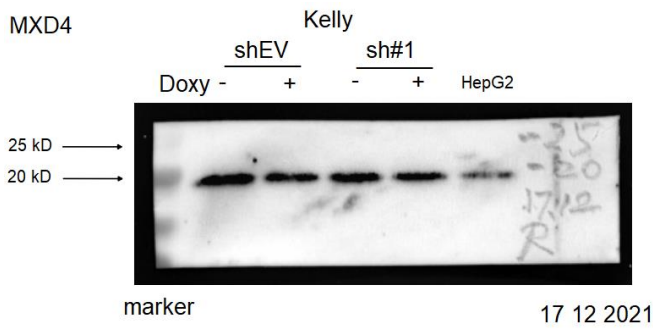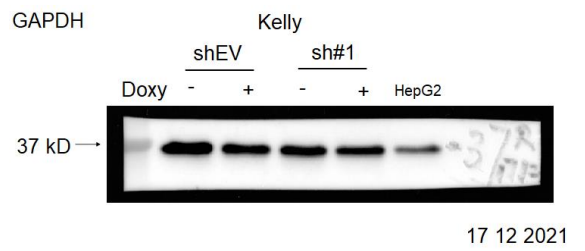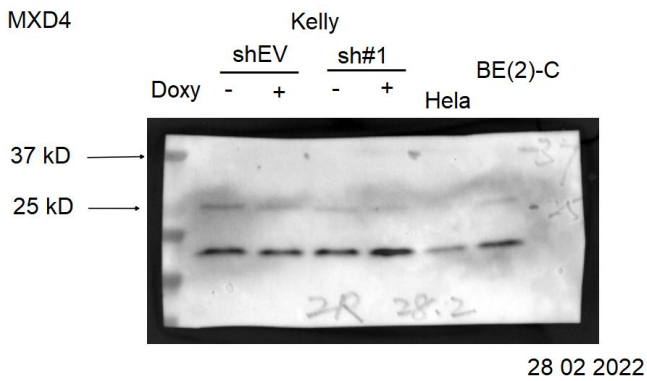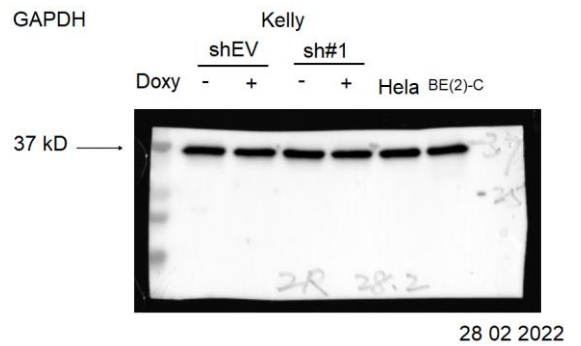

**Supp Figure 3c continued**  
**MAX binding partners**

**MXD5**

MXD5 (33kD)

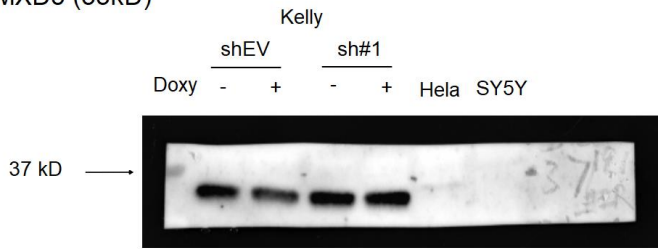

19 01 2022

GAPDH

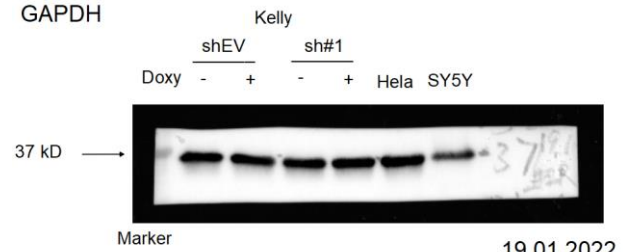

19 01 2022

MXD5

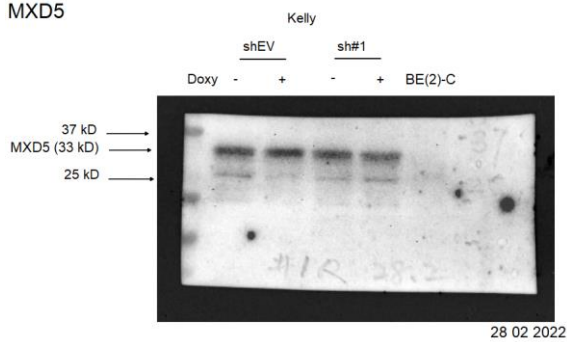

28 02 2022

GAPDH

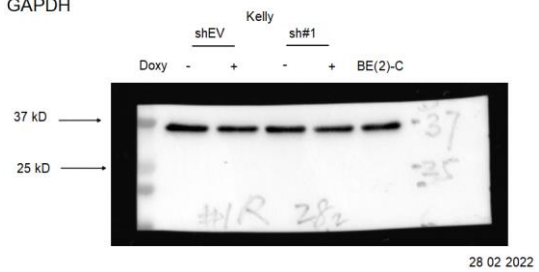

28 02 2022

MXD5

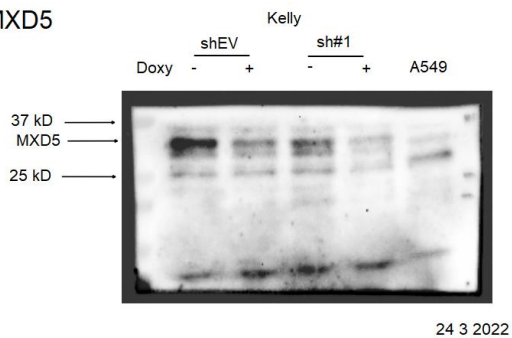

24 3 2022

GAPDH

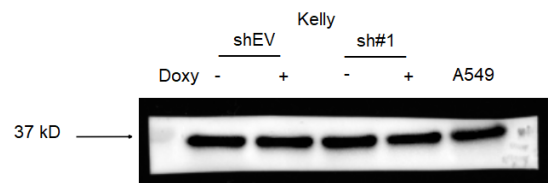

24 3 2022

**Supp Figure 3c continued**  
**MAX binding partners**

**MXD6**

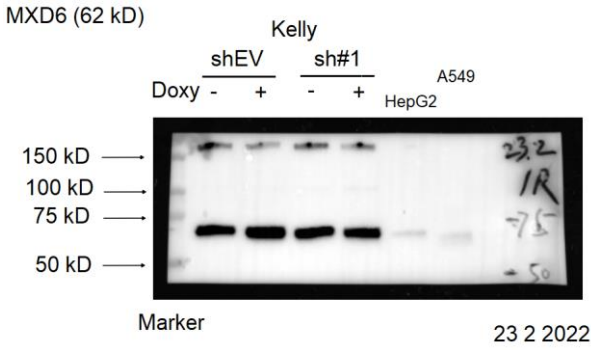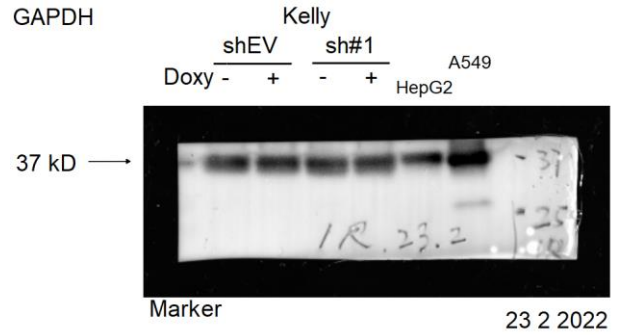

**MXD6**

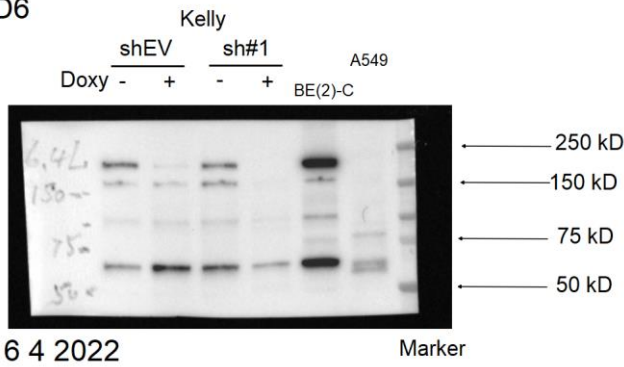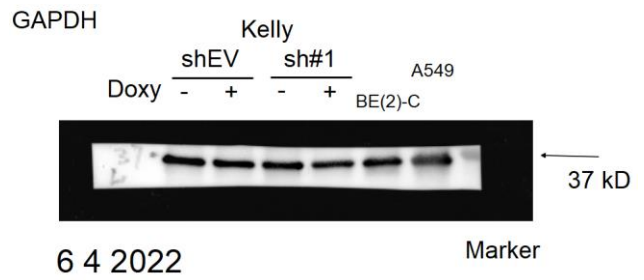

**MXD6**

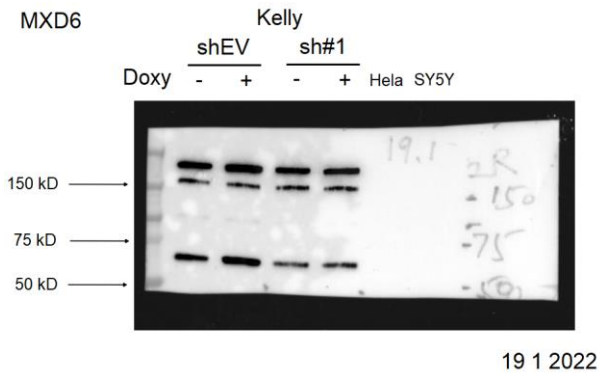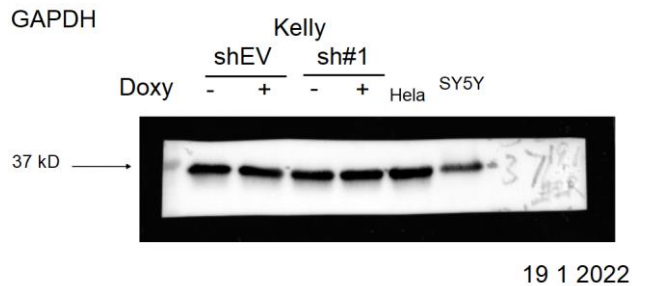

Supp Figure 3c continued  
MAX binding partners

MXD7

MXD7 (30 kD)

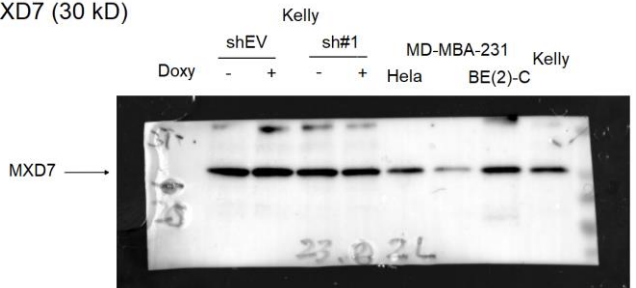

23 2 2022

GAPDH

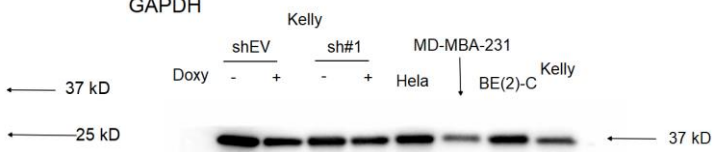

23 2 2022

MXD7 (30 kD)

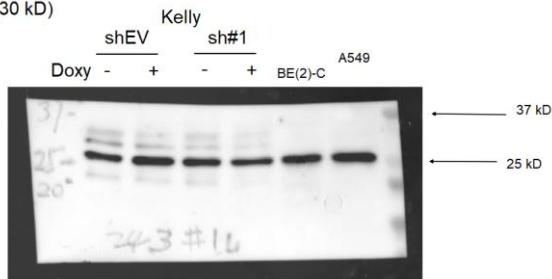

24 3 2022

GAPDH

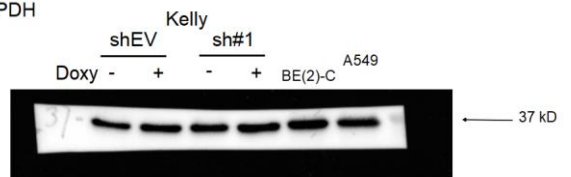

24 3 2022

MXD7 (30 kD)

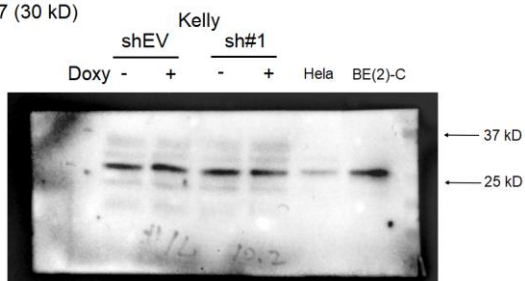

10 2 2022

GAPDH

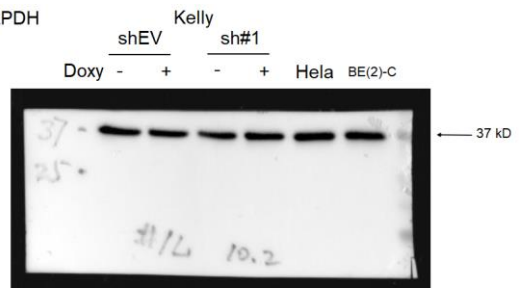

10 2 2022

**Supp Figure 3d continued**  
**KELLY +/- Dox Control, sh1, HeLa MAX and GAPDH**

8/03/2022

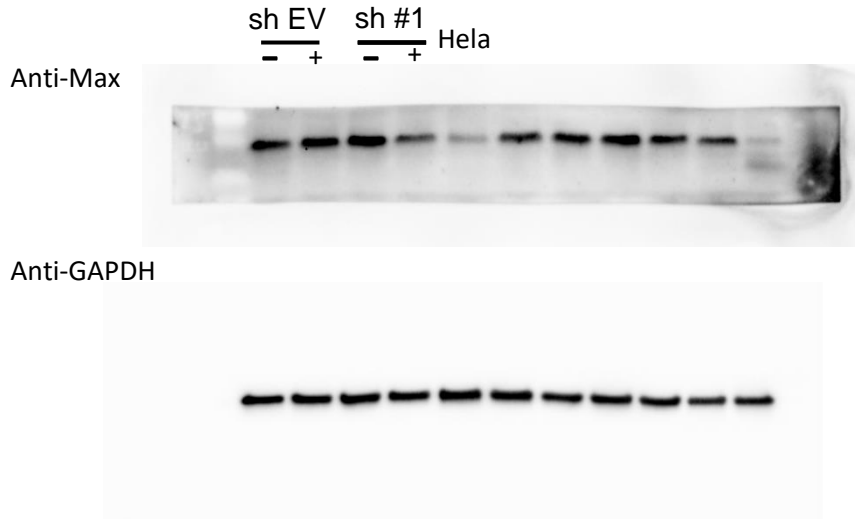

**Labeled samples used for supplementary figure 3B**

8/03/2022

Merged with protein marker

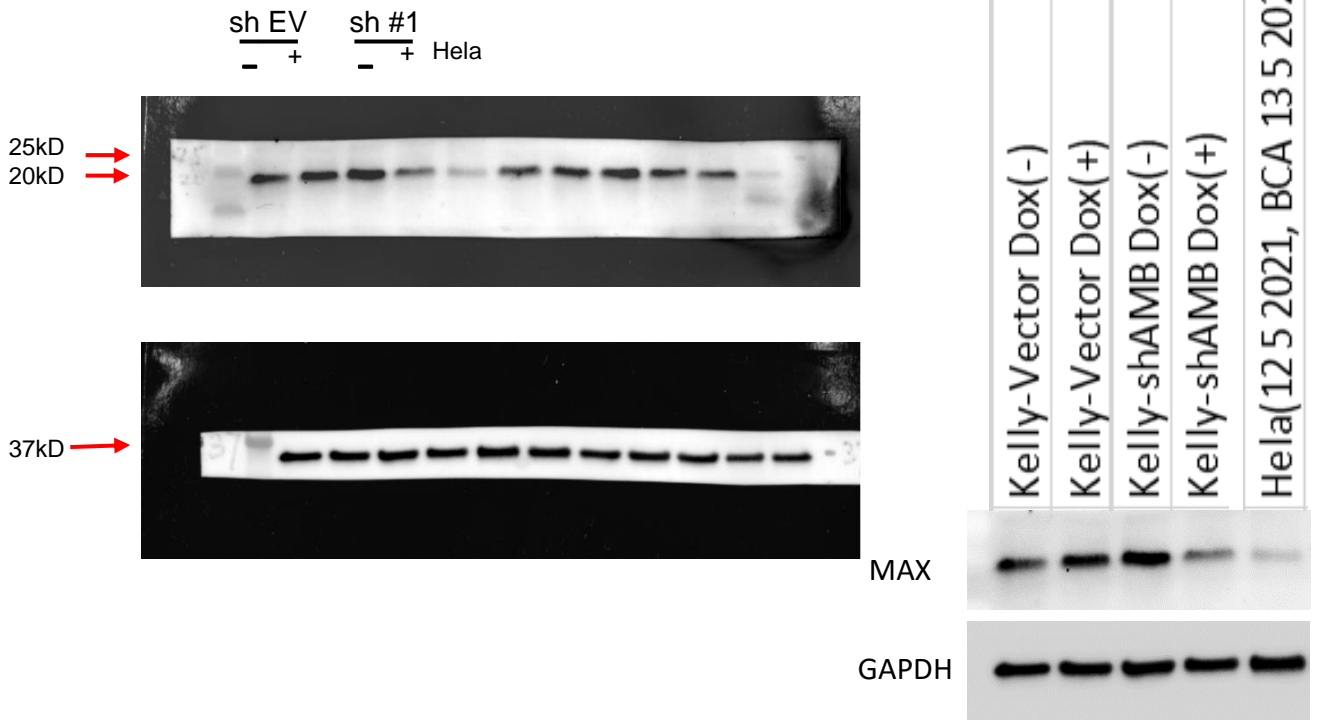

**Run#3**  
 (Western-8 3 2022)

**Supp Figure 3d**  
**Co-IP MYCN and MAX**

IP:MYCN

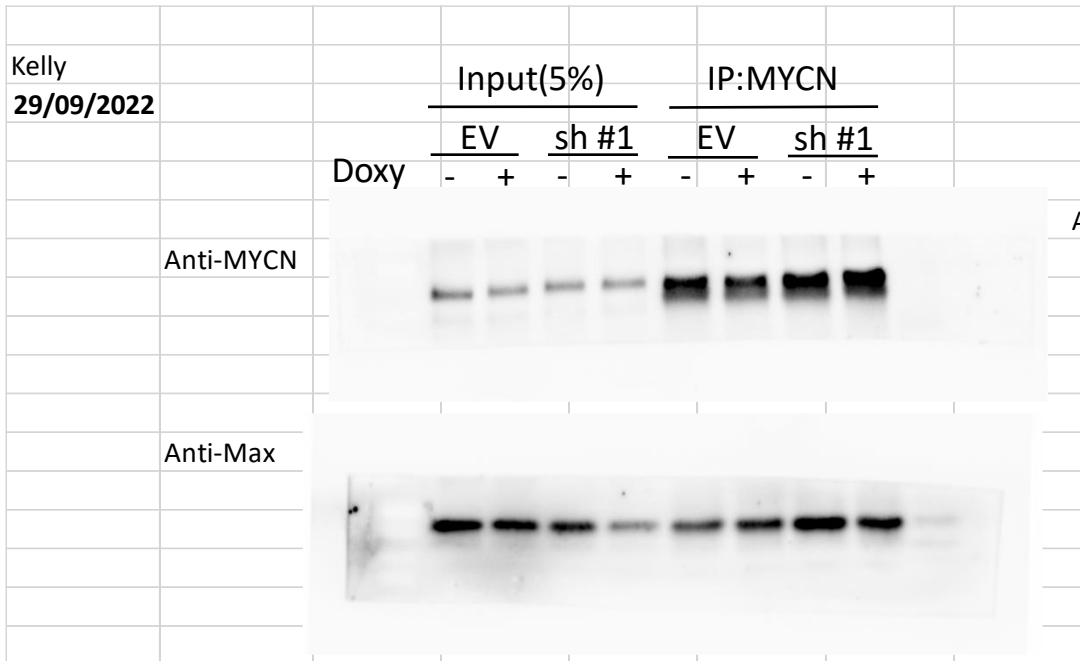

A

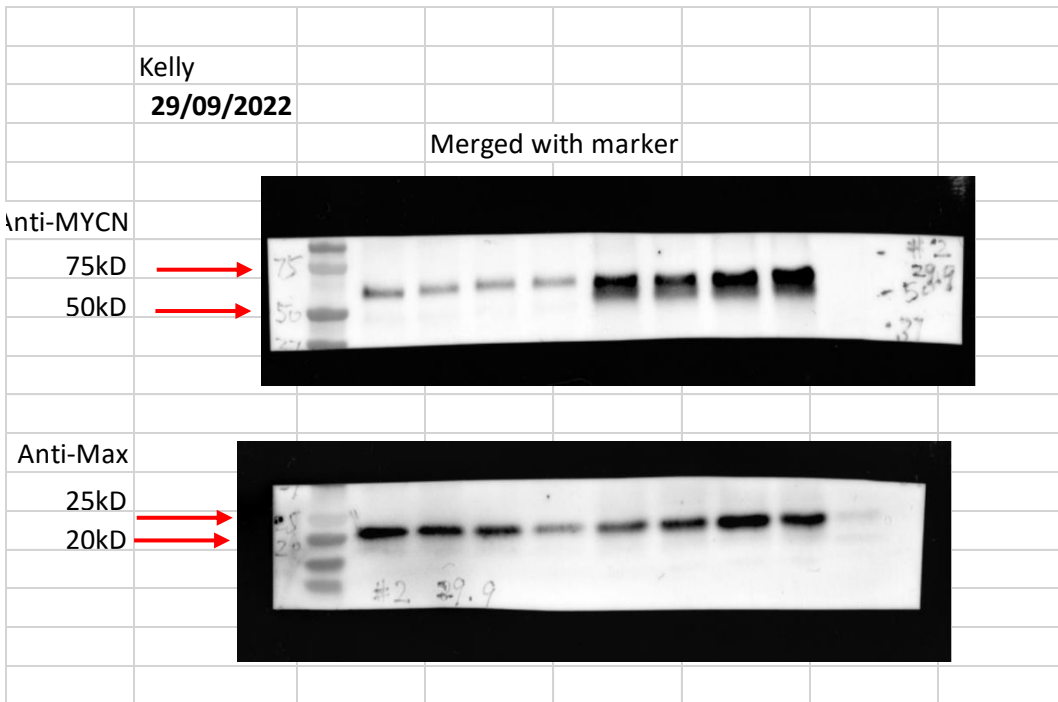

**Supp Figure 3d continued**  
**Co-IP MYCN and MAX**

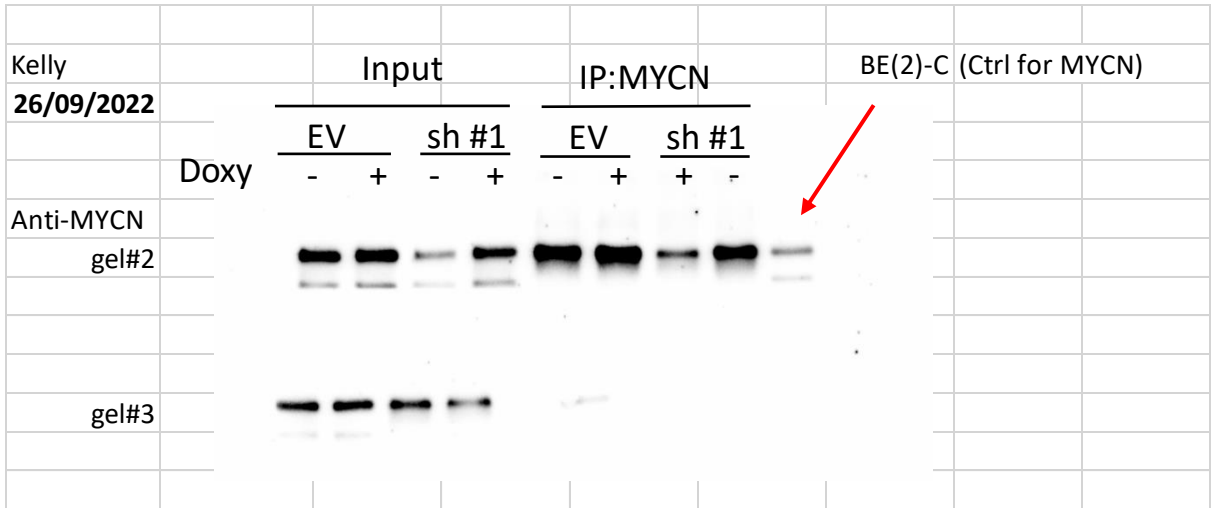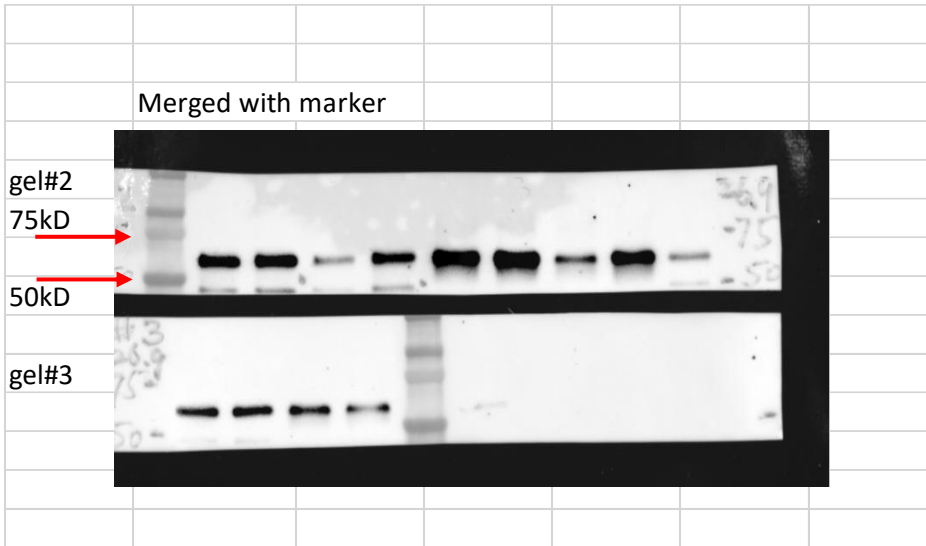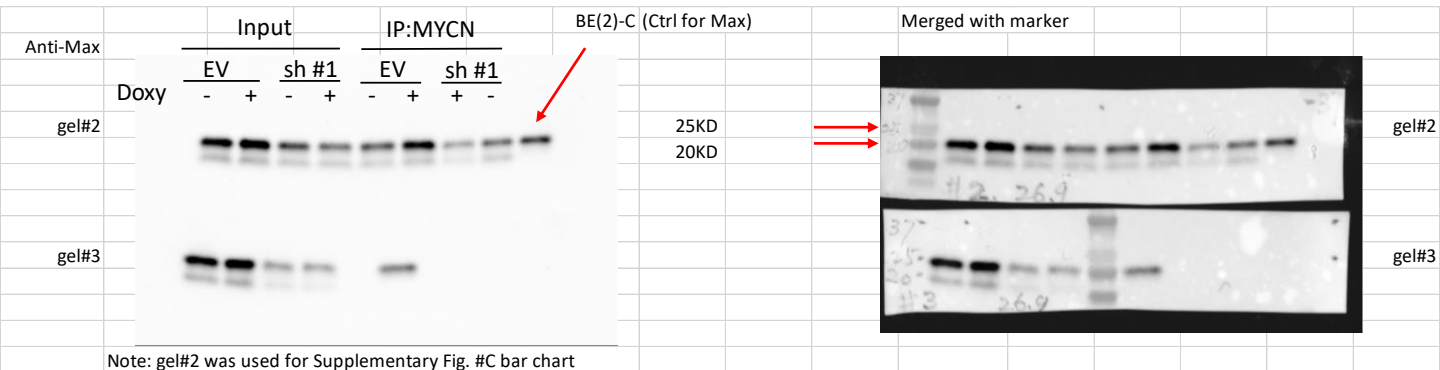



**Supp Figure 3d continued**  
**Co-IP MYCN and MAX**

|            |                                                                                      |   |   |   |   |   |   |   |   |
|------------|--------------------------------------------------------------------------------------|---|---|---|---|---|---|---|---|
| Kelly      |                                                                                      |   |   |   |   |   |   |   |   |
| 14/03/2022 |                                                                                      |   |   |   |   |   |   |   |   |
| Anti-MYCN  | 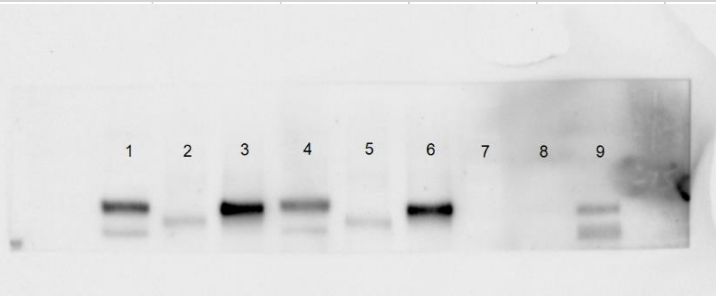   |   |   |   |   |   |   |   |   |
| gel#1      | 1                                                                                    | 2 | 3 | 4 | 5 | 6 | 7 | 8 | 9 |
| gel#2      |    |   |   |   |   |   |   |   |   |
| Anti-Max   |   |   |   |   |   |   |   |   |   |
| gel#1      | 1                                                                                    | 2 | 3 | 4 | 5 | 6 | 7 | 8 | 9 |
| gel#2      |  |   |   |   |   |   |   |   |   |

**Supp Figure 3d**  
**Co-IP MYCN and MAX (Kelly 14/03/2022)**

Merged with marker

gel#1

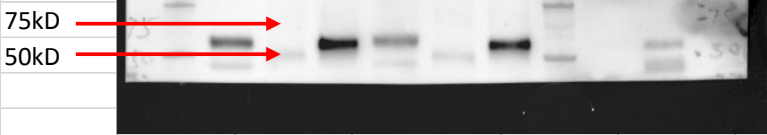

Lane (left to right)

- 1 Input
- 2 IgG Ctrl
- 3 N-Myc IP
- 4 Input
- 5 IgG Ctrl
- 6 N-Myc IP
- 7 Protein marker
- 8 HeLa (negative Ctrl for MYCN)
- 9 Kelly (positive Ctrl for MYCN)

gel#2

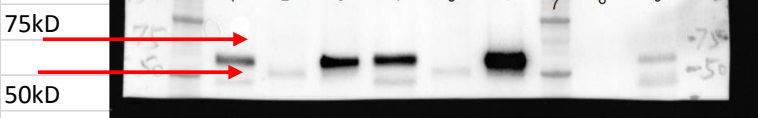

Merged with marker

Anti-Max

gel#1

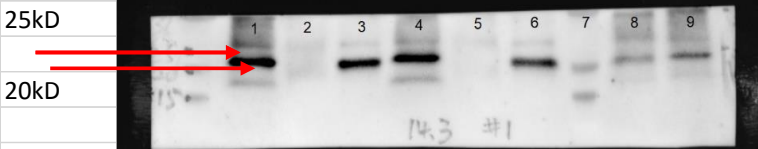

Lane (left to right)

- 1 Input
- 2 IgG Ctrl
- 3 N-Myc IP
- 4 Input
- 5 IgG Ctrl
- 6 N-Myc IP
- 7 Protein marker
- 8 HeLa (Ctrl for Max)
- 9 Kelly

gel#2

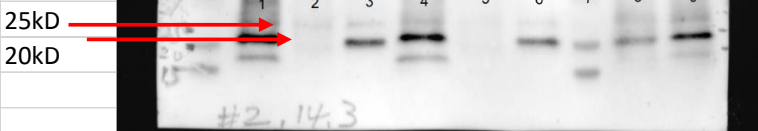

# Supp Figure 3e

## MYCN promotor targets

From File named (shAMBPos - F1HUTGPos) - (shAMBNeg - F1HUTGNeg)\_tpm\_spia\_kegg\_go

| genes   | entrez_id | logFC   | logCPM  | LR       | PValue   | FDR      | FC     |                               |
|---------|-----------|---------|---------|----------|----------|----------|--------|-------------------------------|
| GSPT1   | 2935      | -1.2101 | 8.2221  | 121.8671 | 2.47E-28 | 2.05E-26 | -2.314 |                               |
| CLNS1A  | 1207      | -0.9988 | 7.6921  | 90.2715  | 2.08E-21 | 9.71E-20 | -1.998 |                               |
| NAP1L1  | 4673      | -1.0298 | 10.2684 | 89.8286  | 2.60E-21 | 1.21E-19 | -2.042 |                               |
| APEX1   | 328       | -0.3399 | 8.1752  | 10.3217  | 0.001    | 0.004    | -1.266 |                               |
| TFAP4   | 7023      | -0.0923 | 3.7110  | 0.1463   | 0.702    | 0.782    | -1.066 |                               |
| MAX     | 4149      | -0.695  | 5.580   | 37.143   | 1.10E-09 | 1.30E-08 | -1.619 |                               |
| RUNX1T1 | 862       | 0.189   | 5.259   | 2.460    | 0.117    | 0.195    | 1.140  |                               |
| NTRK1   | 4914      | 2.6852  | 2.9938  | 50.4777  | 1.21E-12 | 2.20E-11 | 6.432  | Confirmed by Western in Kelly |

From File named shAMBPos - shAMBNeg\_tpm\_spia\_kegg\_go

| genes   | entrez_id | logFC  | logCPM | LR      | PValue      | FDR      | FC     |                               |
|---------|-----------|--------|--------|---------|-------------|----------|--------|-------------------------------|
| GSPT1   | 2935      | -1.282 | 8.222  | 266.418 | 0.000       | 6.82E-58 | -2.431 |                               |
| CLNS1A  | 1207      | -1.076 | 7.692  | 205.693 | 0.000       | 6.94E-45 | -2.109 |                               |
| NAP1L1  | 4673      | -1.104 | 10.268 | 202.726 | 0.000       | 2.97E-44 | -2.150 |                               |
| APEX1   | 328       | -0.225 | 8.175  | 9.056   | 0.003       | 0.005    | -1.169 |                               |
| TFAP4   | Not found |        |        |         |             |          |        |                               |
| MAX     | 4149      | -0.623 | 5.580  | 58.945  | 1.62E-14    | 1.34E-13 | -1.540 |                               |
| RUNX1T1 | 862       | 0.026  | 5.259  | 0.095   | 0.758031911 | 0.797    | 1.018  |                               |
| NTRK1   | 4914      | 3.163  | 2.994  | 127.779 | 1.25E-29    | 3.17E-28 | 8.958  | Confirmed by Western in Kelly |

Gene expression in vector control of shRNA Seq, from file "F1HUTGPos - F1HUTGNeg\_tpm"

| genes  | entrez_id | logFC        | logCPM      | LR          | PValue      | FDR         | FC           |
|--------|-----------|--------------|-------------|-------------|-------------|-------------|--------------|
| GSPT1  | 2935      | -0.071651399 | 8.222058511 | 0.863104586 | 0.352871351 | 0.7565982   | -1.050918943 |
| CLNS1A | 1207      | -0.07744534  | 7.692095616 | 1.093632294 | 0.295667809 | 0.7565982   | -1.055147977 |
| NAP1L1 | 4673      | -0.074435657 | 10.26844727 | 0.943921451 | 0.331271381 | 0.7565982   | -1.052949071 |
| APEX1  | 328       | 0.114728462  | 8.175193999 | 2.352291941 | 0.12509896  | 0.7565982   | 1.082771232  |
| TFAP4  | 7023      | 0.27792397   | 3.711041207 | 2.653809674 | 0.10330206  | 0.7565982   | 1.212448922  |
| MYCN   | 4613      | 0.061924261  | 11.59586714 | 0.568396003 | 0.450897007 | 0.778420951 | 1.043857125  |
| MAX    | 4149      | 0.0720874    | 5.580076539 | 0.808114975 | 0.368678146 | 0.7565982   | 1.051236592  |

# Supp Figure 4a

## SY5Y: shEV, Sh#1, sh#2 RUNX1T1 and ACTIN

27/05/2019

SH-SY5Y cells

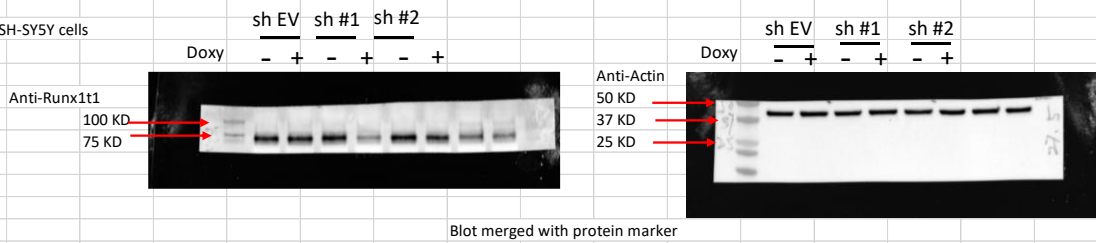

3/10/2019

SH-SY5Y cells

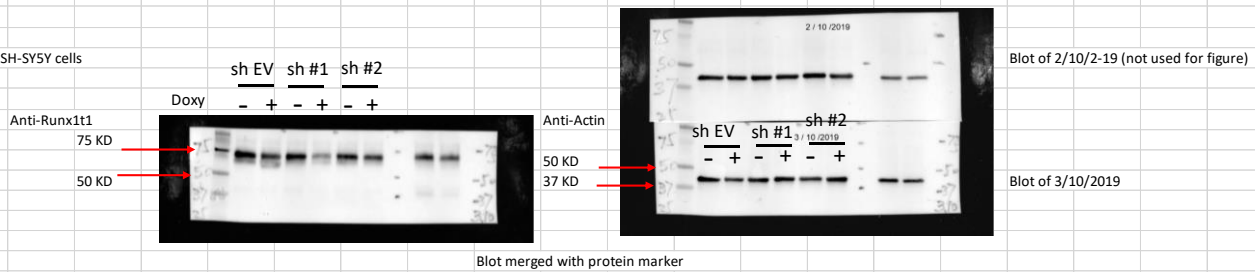

17/02/2020  
gel#2

SH-SY5Y cells

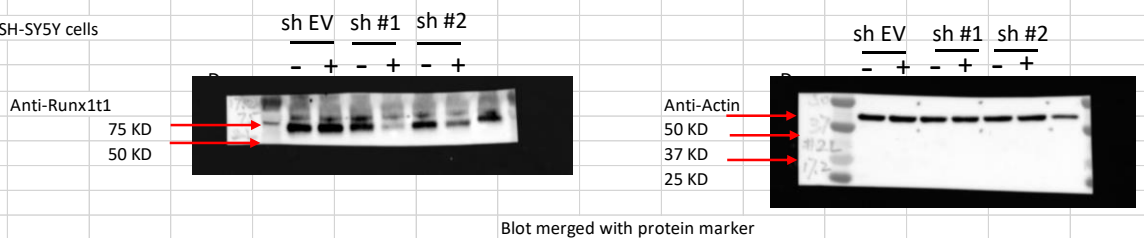

11/03/2020  
gel#1

SH-SY5Y cells

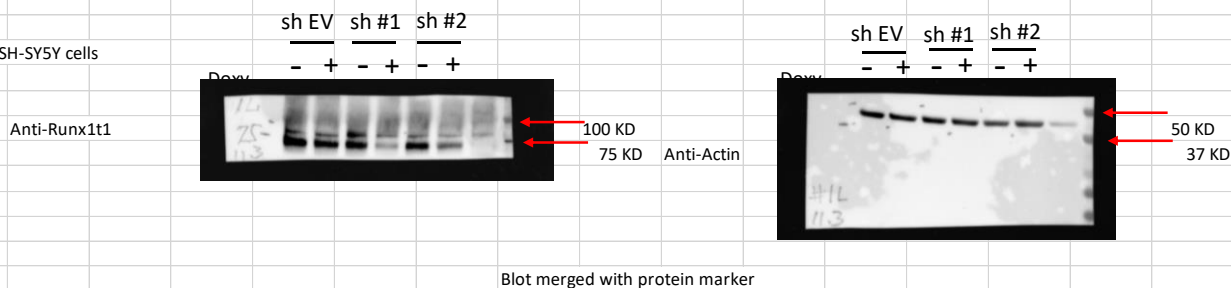

**Supp Figure 4b**  
**SY5Y shRNA colonies**

**SY5Y FH1UTG RUN 1**

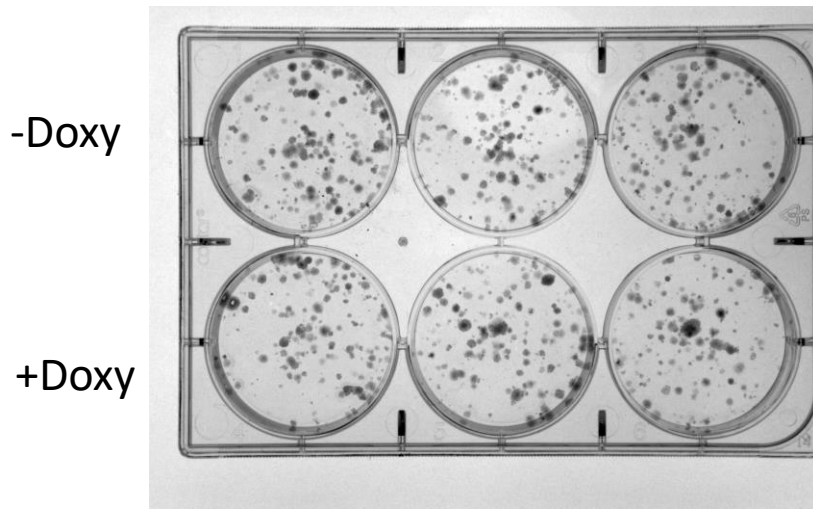

**SY5Y sh#1 RUN 1**

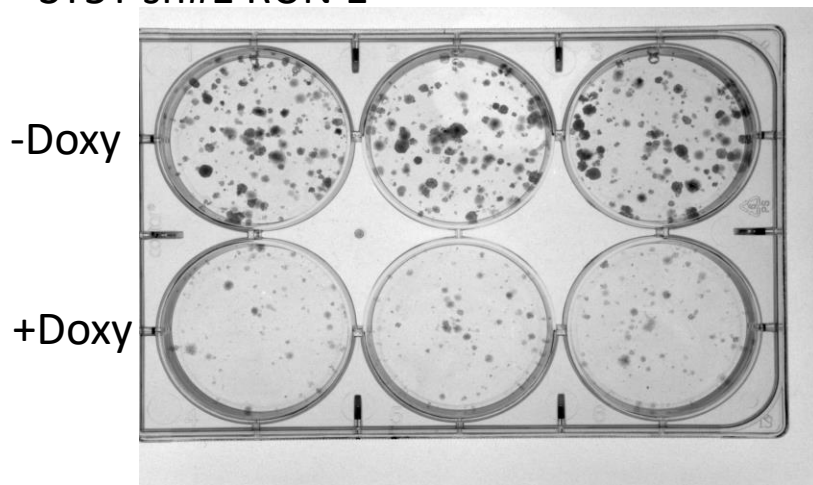

**SY5Y sh#2 RUN 1**

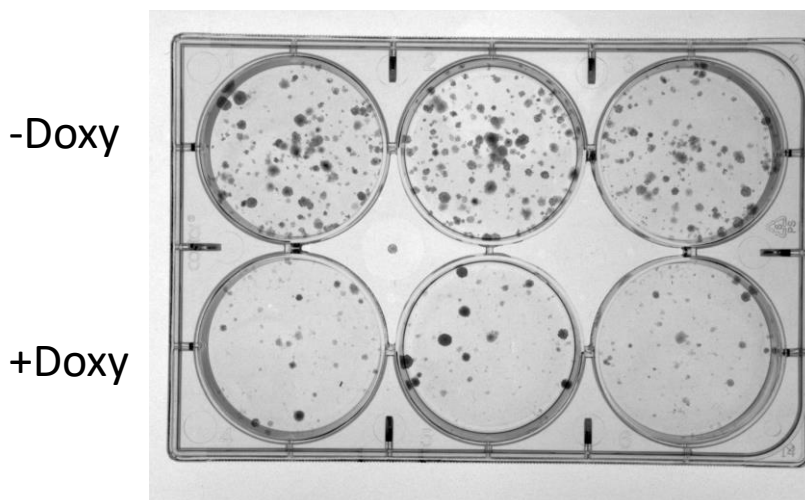

Supp Figure 4b  
SY5Y shRNA colonies

SY5Y FH1UTG RUN 2

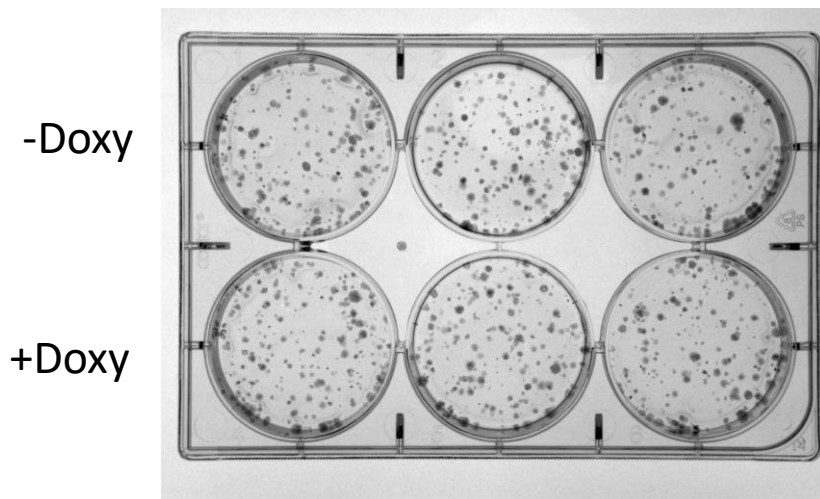

SY5Y sh#1 RUN 2

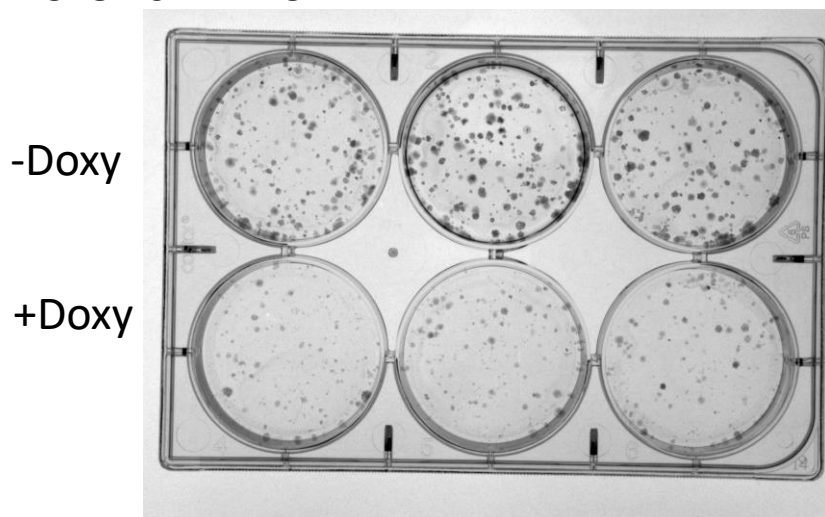

SY5Y sh#2 RUN 2

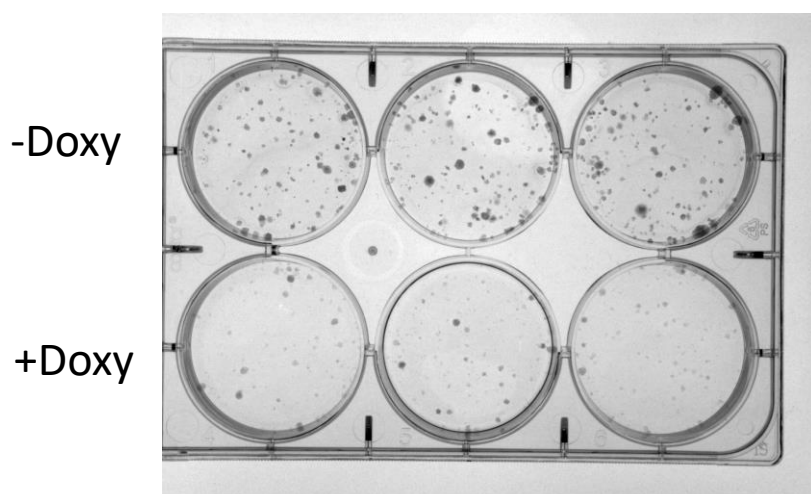

**Supp Figure 4b**  
**SY5Y shRNA colonies**

**SY5Y FH1UTG RUN 3**

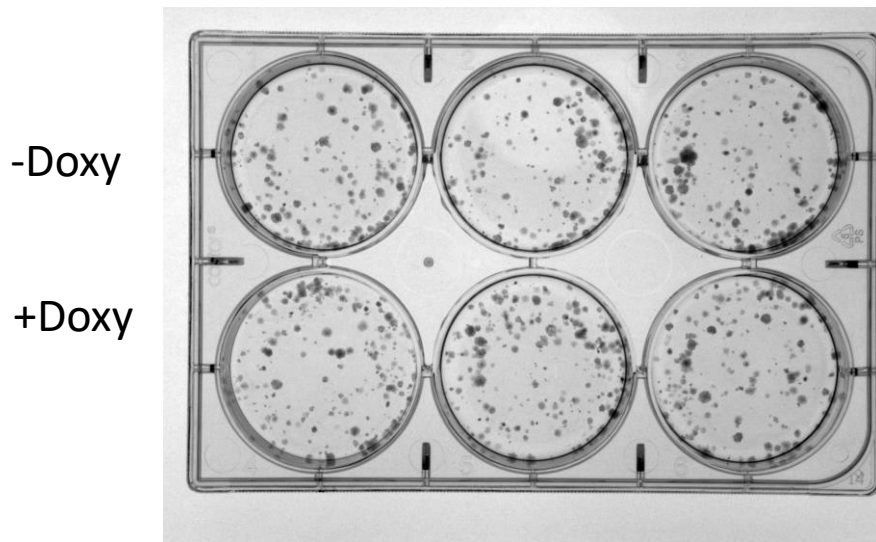

**SY5Y sh#1 RUN 3**

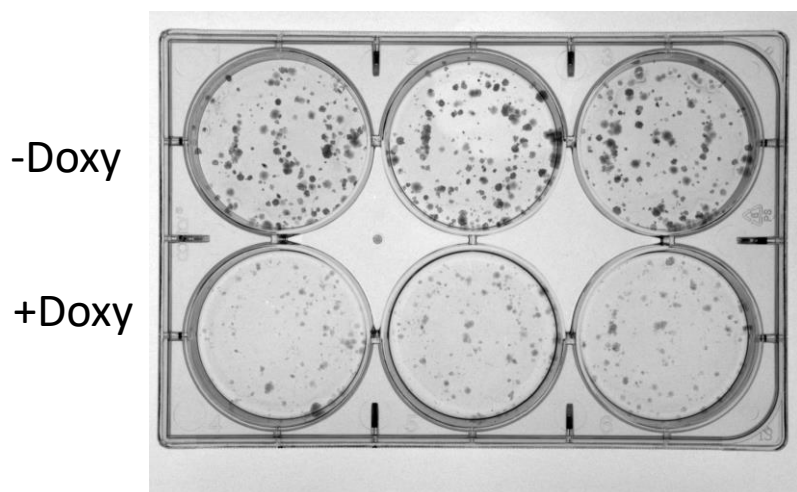

**SY5Y sh#2 RUN 3sad**

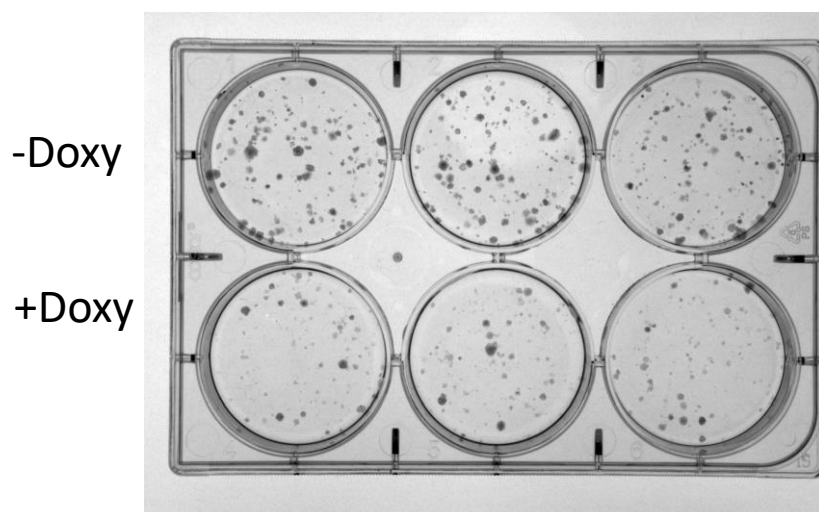

Supp Figure 5c

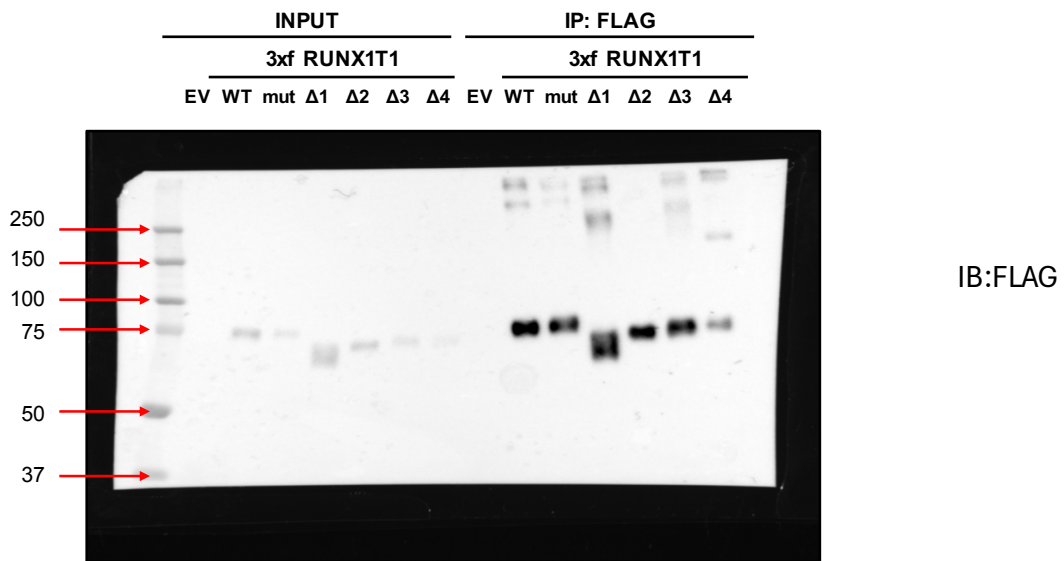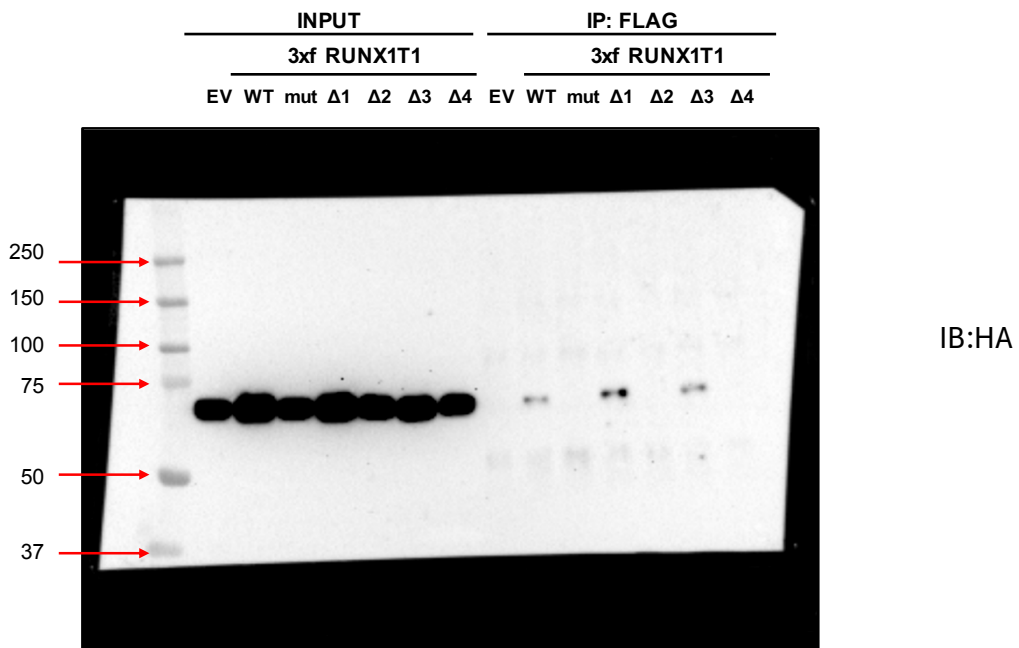



Supp Figure 5d

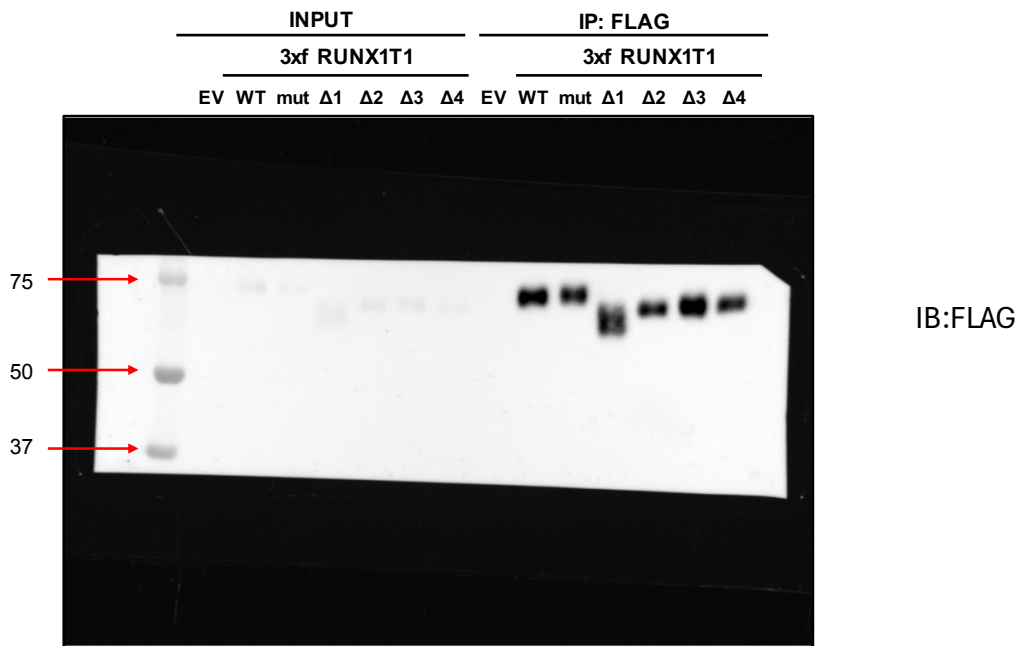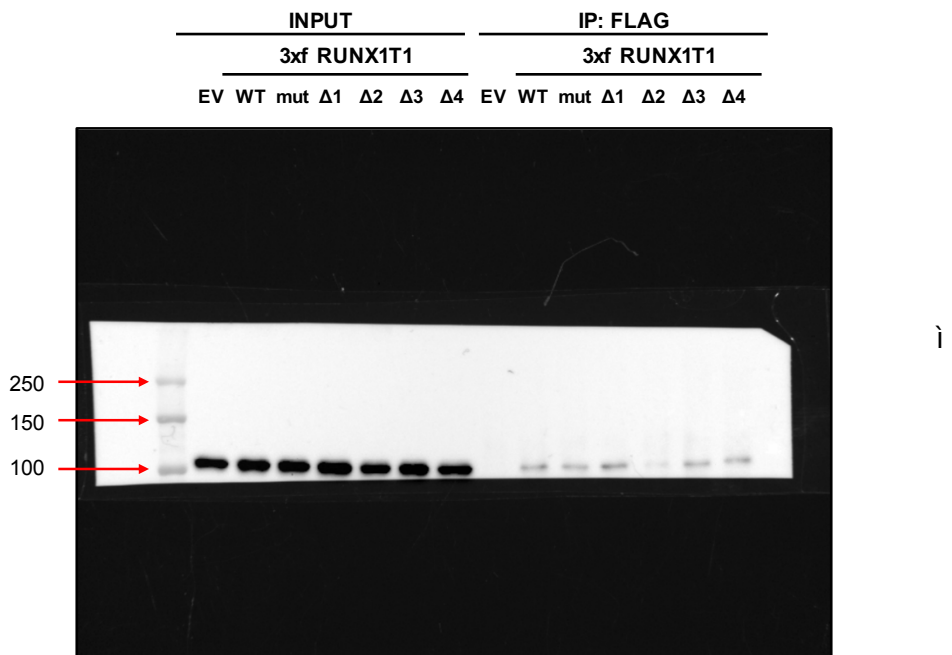

Supp Figure 5e  
KELLY shHAND2

Run 1\_main

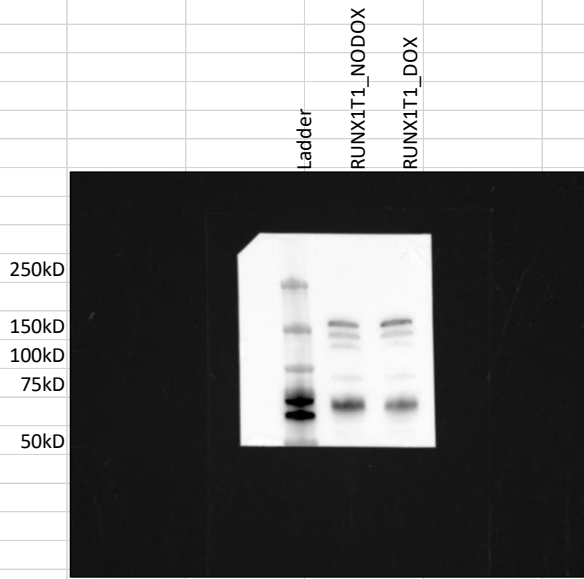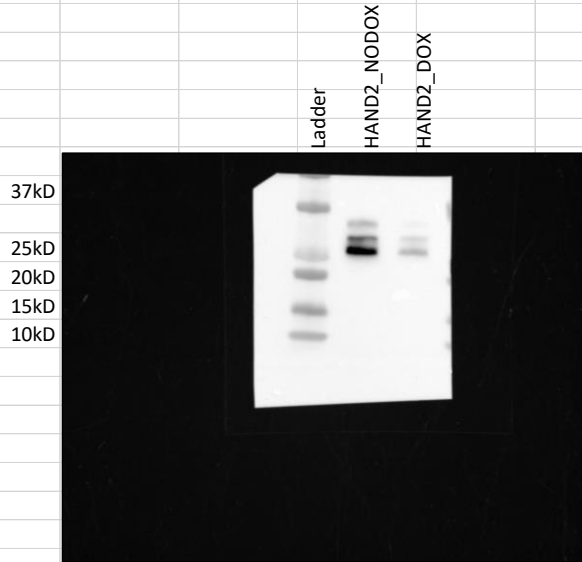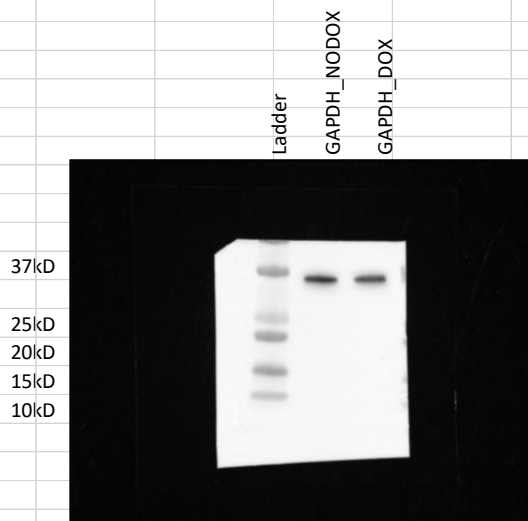

Supp Figure 5e continued  
KELLY shHAND2

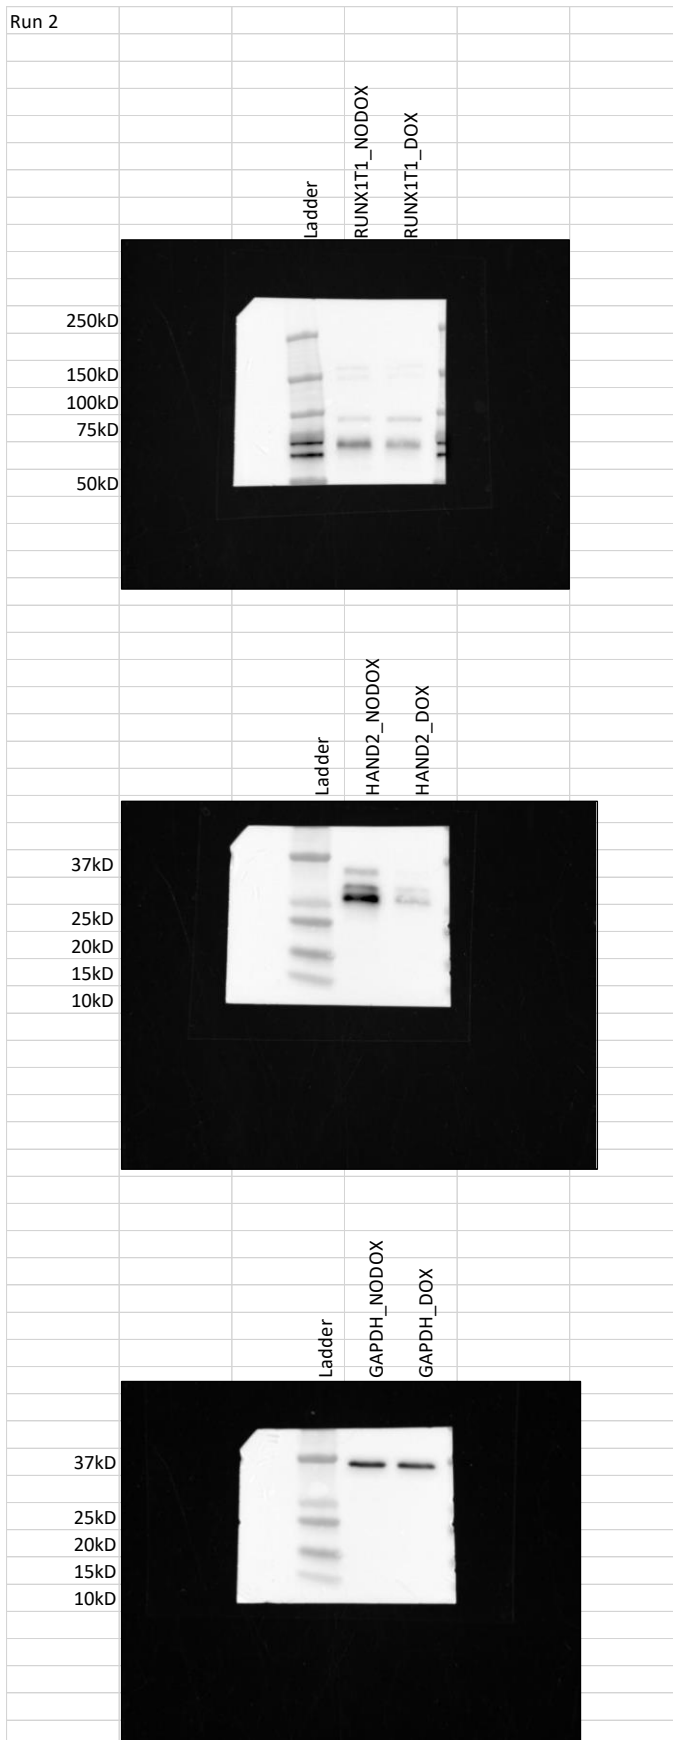

Supp Figure 5e continued  
KELLY shHAND2

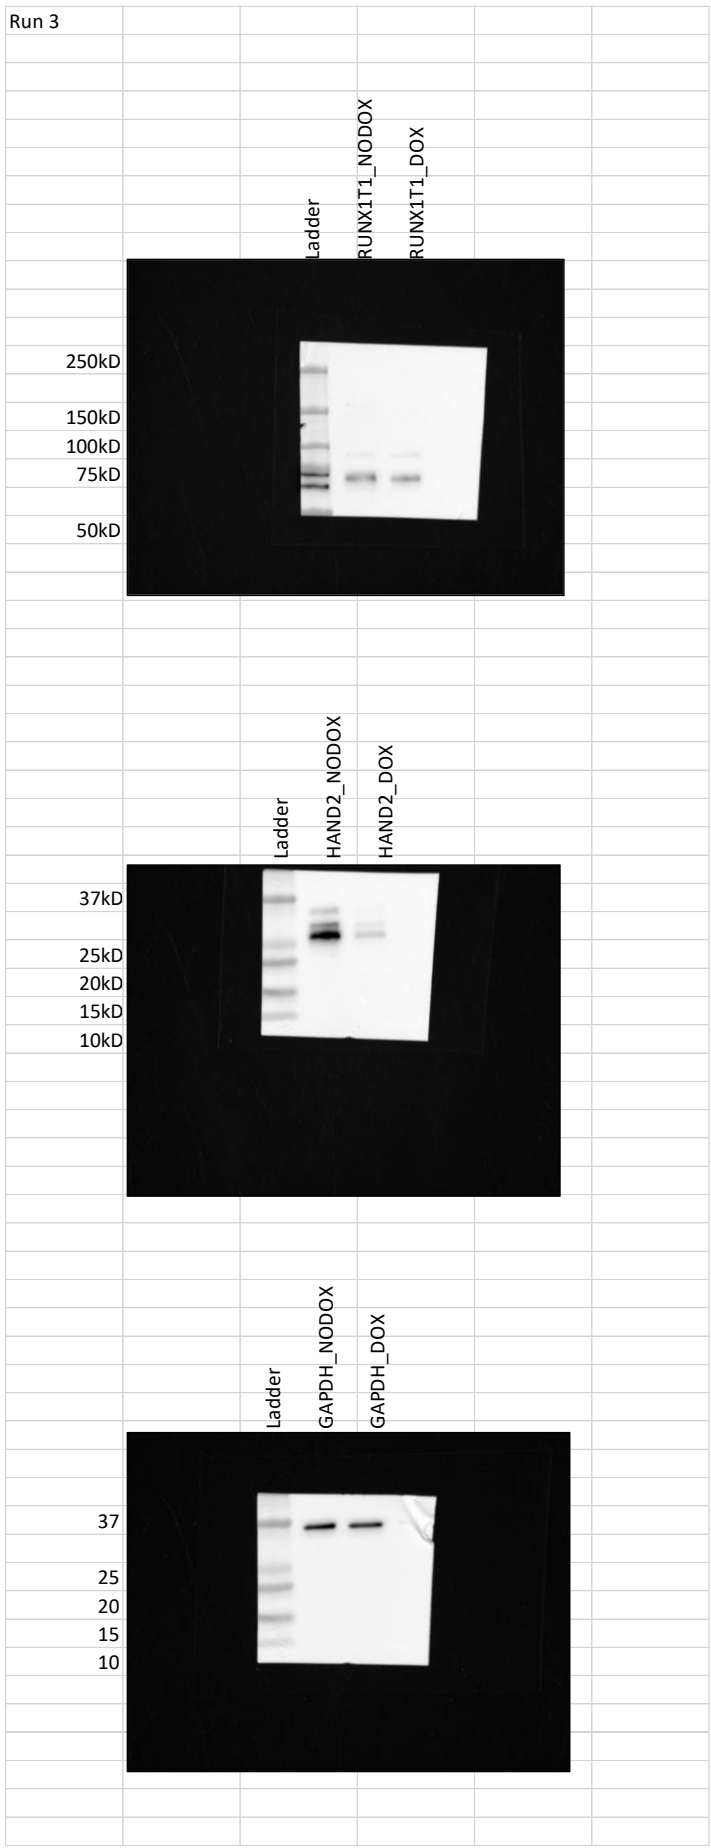

# Supp Figure 5g

|                                                      | Input | Input_HAND2-KD | HAND2 ChIP | HAND2 CHIP-HAND2-KD | RUNX1T1 ChIP | RUNX1T1 CHIP-HAND2-KD |
|------------------------------------------------------|-------|----------------|------------|---------------------|--------------|-----------------------|
| ETO_peak1-rep1                                       | 1     | 1              | 47.17      | 13.25               | 14.35        | 4.2                   |
| ETO_peak1-rep2                                       | 1     | 1              | 53.77      | 11.98               | 14.89        | 6.92                  |
| ETO_peak1-rep3                                       | 1     | 1              | 33.84      | 15.38               | 11.49        | 6.4                   |
| ETO_peak2-rep1                                       | 1     | 1              | 18.65      | 3.76                | 5.71         | 1.72                  |
| ETO_peak2-rep2                                       | 1     | 1              | 17.64      | 1.75                | 5.38         | 2.5                   |
| ETO_peak2-rep3                                       | 1     | 1              | 14.73      | 4.65                | 5.25         | 2.09                  |
| ETO_peak3-rep1                                       | 1     | 1              | 54.52      | 10.66               | 18.52        | 4.39                  |
| ETO_peak3-rep2                                       | 1     | 1              | 43.07      | 12.4                | 20.82        | 6.19                  |
| ETO_peak3-rep3                                       | 1     | 1              | 48.39      | 17.9                | 25.43        | 8.84                  |
| ETO_peak4-rep1                                       | 1     | 1              | 13.55      | 2.78                | 3.55         | 1.02                  |
| ETO_peak4-rep2                                       | 1     | 1              | 10.57      | 3.24                | 3.72         | 1.52                  |
| ETO_peak4-rep3                                       | 1     | 1              | 11.4       | 4.93                | 4.12         | 2.91                  |
| <i>Normalized Fold Enrichment 2<sup>Δ</sup>-DDCT</i> |       |                |            |                     |              |                       |

| OFFICIAL NAME | Lab. TUBE NAME | Sequence_FW                              | Sequence_RV | Coordinates on hg38      |
|---------------|----------------|------------------------------------------|-------------|--------------------------|
| ETO_Peak1     | 1971           | ACTTGCACAAACCAGAGCTGGGACTTCCGCCTTGTAATGA |             | chr8:143039154+143039227 |
| ETO_Peak2     | 2692           | AGGGCGTCATCCTCTTCTTGTGGCCAGGCTTTTATTGTGC |             | chr17:35801573+35801650  |
| ETO_Peak3     | 2746           | AATCCCAACCCCGCATATGAAGGCTGCATGGAGAAAAGC  |             | chr15:62878257+62878379  |
| ETO_Peak4     | ngfr           | ACACACACACATACACACCCTGCCACGAGAGCTACAAG   |             | chr17:49515378+49515507  |

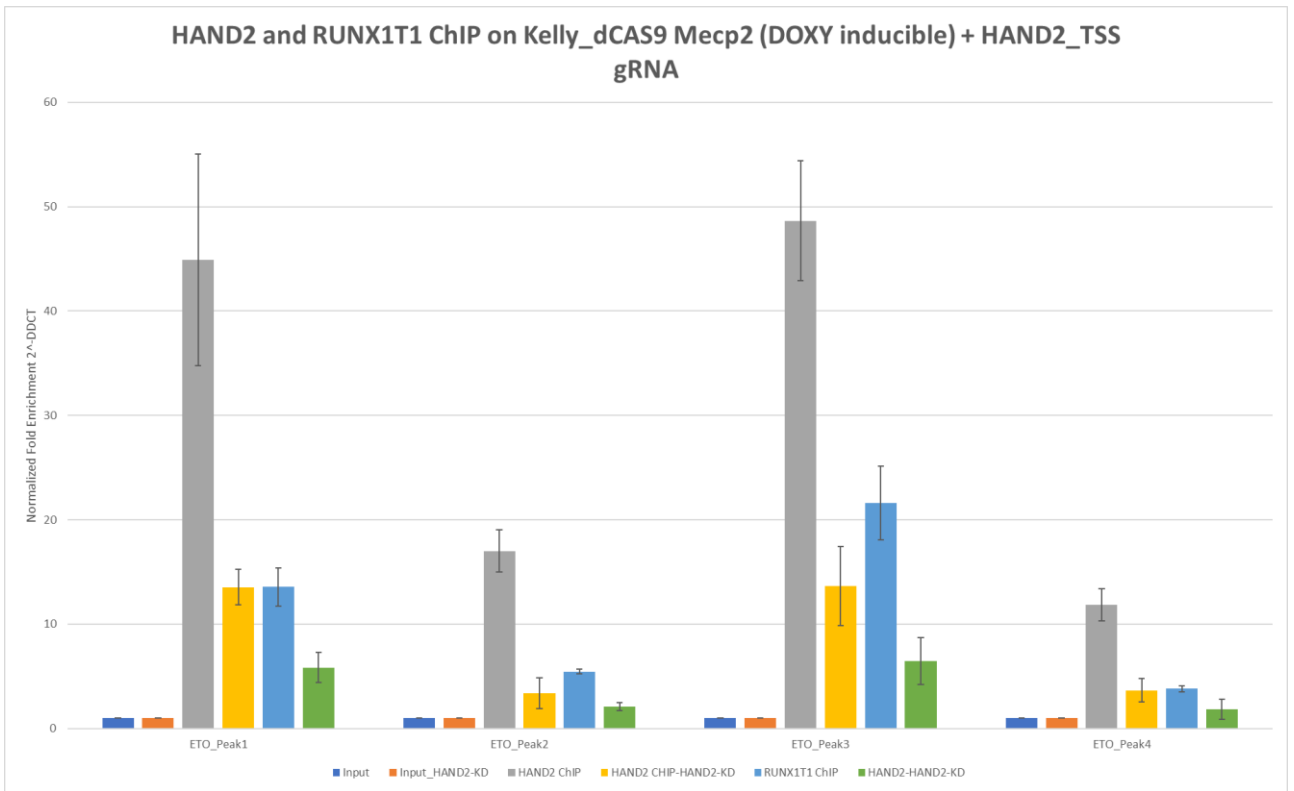

|           | Two-tailed P value |            |             |
|-----------|--------------------|------------|-------------|
|           | HAND2              | RUNX1T1    |             |
| ETO_Peak1 | 0.0062 **          | 0.0045 **  | * ≤ 0,05    |
| ETO_Peak2 | 0.0007 ***         | 0.0002 *** | ** ≤ 0,01   |
| ETO_Peak3 | 0.0009 ***         | 0.0033 **  | *** ≤ 0,001 |
| ETO_Peak4 | 0.0018 **          | 0.0284 *   |             |

# Supp Figure 7b

## RH41 MYCN Knockdown RUNX1T1 and GAPDH

RH41 cells  
15/02/2023

Merged with protein marker

Anti-Runx1t1

gel#1

gel#2

Mock Ctrl #6 #8 A549

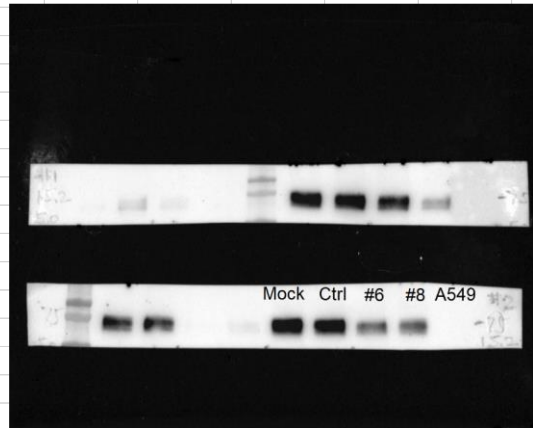

75kD

50kD

Anti-GAPDH

gel#1

gel#2

Mock Ctrl #6 #8 A549

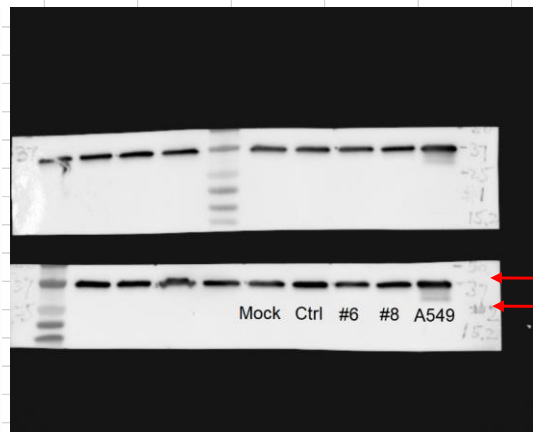

37kD

25kD

Note: Ctrl, siRNA#6 and #8 in gel#2 were used for supplementary Fig.7B

# Supp Figure 7b

## RH41 MYCN Knockdown RUNX1T1 IncuCyte

| Run#1         |               | Set up on 10/11/2022 |                    |                  |          |          |                |                        |  |
|---------------|---------------|----------------------|--------------------|------------------|----------|----------|----------------|------------------------|--|
| Elapsed (hrs) | control siRNA | control siRNA        | Ctrl siRNA Average | % of Ctrl at 0 h | siRNA #8 | siRNA #8 | siRNA#8Average | % of Ctrl siRNA at 0 h |  |
| 0.00          | 707.67        | 669.89               | 688.78             | 100.0%           | 506.22   | 518.56   | 512.39         | 74.4%                  |  |
| 12.00         | 952.67        | 865.78               | 909.22             | 132.0%           | 605.89   | 606.00   | 605.94         | 88.0%                  |  |
| 24.00         | 1163.67       | 1113.56              | 1138.61            | 165.3%           | 731.00   | 746.22   | 738.61         | 107.2%                 |  |
| 36.00         | 1442.44       | 1377.56              | 1410.00            | 204.7%           | 885.22   | 884.67   | 884.94         | 128.5%                 |  |
| 48.00         | 1791.78       | 1722.44              | 1757.11            | 255.1%           | 1042.89  | 1036.89  | 1039.89        | 151.0%                 |  |
| 60.00         | 2313.56       | 2133.33              | 2223.44            | 322.8%           | 1226.56  | 1226.22  | 1226.39        | 178.1%                 |  |
| 72.00         | 2645.33       | 2578.67              | 2612.00            | 379.2%           | 1434.11  | 1444.78  | 1439.44        | 209.0%                 |  |
| 84.00         | 2896.00       | 2768.67              | 2832.33            | 411.2%           | 1732.11  | 1756.22  | 1744.17        | 253.2%                 |  |
| 96.00         | 2740.89       | 2661.11              | 2701.00            | 392.1%           | 2168.56  | 2131.22  | 2149.89        | 312.1%                 |  |

| Run#2         |        | Set up on 12/12/2022 |          |          |                        |        |            |          |          |
|---------------|--------|----------------------|----------|----------|------------------------|--------|------------|----------|----------|
| Elapsed (hrs) | Mock   | Ctrl siRNA           | siRNA #6 | siRNA #8 | % of Ctrl siRNA at 0 h | Mock   | Ctrl siRNA | siRNA #6 | siRNA #8 |
| 0.00          | 504.2  | 374.9                | 332.4    | 261.6    | 134.50                 | 100.00 | 88.68      | 69.77    |          |
| 12.03         | 632.3  | 458.9                | 391.3    | 296.8    | 168.67                 | 122.41 | 104.39     | 79.16    |          |
| 24.03         | 849.4  | 585.0                | 423.3    | 357.6    | 226.59                 | 156.05 | 112.92     | 95.38    |          |
| 36.03         | 1333.7 | 947.1                | 532.9    | 603.6    | 355.75                 | 252.64 | 142.15     | 161.00   |          |
| 48.03         | 1613.9 | 1171.0               | 573.6    | 711.1    | 430.50                 | 312.36 | 152.99     | 189.69   |          |
| 60.03         | 1852.0 | 1415.0               | 634.6    | 750.1    | 494.01                 | 377.45 | 169.26     | 200.09   |          |
| 72.03         | 2202.0 | 1508.1               | 613.8    | 723.9    | 587.37                 | 402.28 | 163.72     | 193.09   |          |
| 84.03         | 2313.6 | 1823.8               | 673.4    | 868.1    | 617.13                 | 486.48 | 179.64     | 231.56   |          |
| 96.03         | 1947.7 | 2039.1               | 789.0    | 987.1    | 519.53                 | 543.92 | 210.46     | 263.31   |          |

| Run#3         |        | Set up on 6/02/2023 2/02/2023 |          |          |                        |      |            |          |          |
|---------------|--------|-------------------------------|----------|----------|------------------------|------|------------|----------|----------|
| Elapsed (hrs) | Mock   | Ctrl siRNA                    | siRNA #6 | siRNA #8 | % of Ctrl siRNA at 0 h | Mock | Ctrl siRNA | siRNA #6 | siRNA #8 |
| 0             | 803.6  | 645.3                         | 429.0    | 518.1    | 125%                   | 100% | 66%        | 80%      |          |
| 12            | 1044.2 | 773.4                         | 467.1    | 545.4    | 162%                   | 120% | 72%        | 85%      |          |
| 24            | 1429.1 | 993.3                         | 558.3    | 711.0    | 221%                   | 154% | 87%        | 110%     |          |
| 36            | 1843.7 | 1284.0                        | 565.6    | 818.6    | 286%                   | 199% | 88%        | 127%     |          |
| 48            | 2278.1 | 1624.6                        | 604.4    | 981.3    | 353%                   | 252% | 94%        | 152%     |          |
| 60            | 2750.3 | 2025.8                        | 668.1    | 1158.3   | 426%                   | 314% | 104%       | 179%     |          |
| 72            | 2668.3 | 2465.6                        | 758.3    | 1366.8   | 413%                   | 382% | 118%       | 212%     |          |
| 84            | 2460.6 | 2898.3                        | 823.3    | 1649.7   | 381%                   | 449% | 128%       | 256%     |          |
| 96            | 2266.1 | 2919.0                        | 1078.8   | 2001.0   | 351%                   | 452% | 167%       | 310%     |          |





Supp Figure 7d  
DMS-273 shRNA RUNX1T1 colonies

Run 1

1000 cells/well

DMS-273-FHIUTG

Doxy (-)

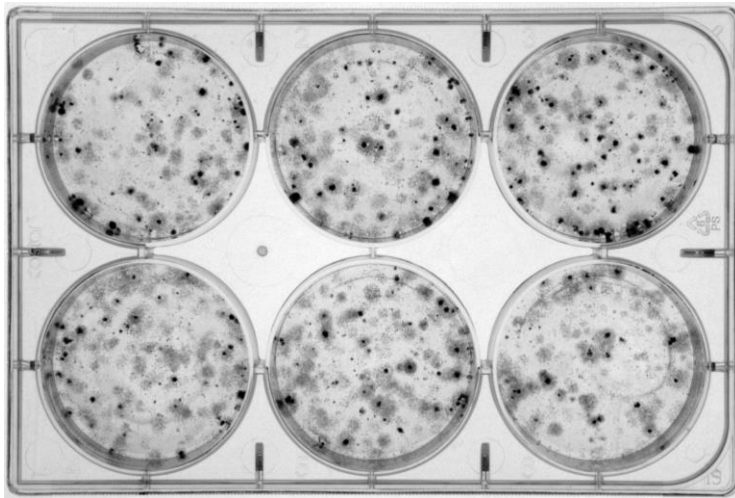

Doxy (+)

DMS-273-Sh#1

Doxy (-)

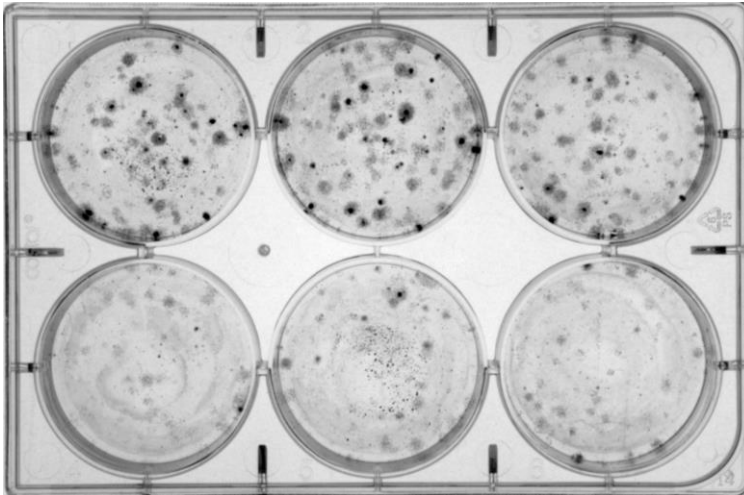

Doxy (+)

DMS-273-Sh#2

Doxy (-)

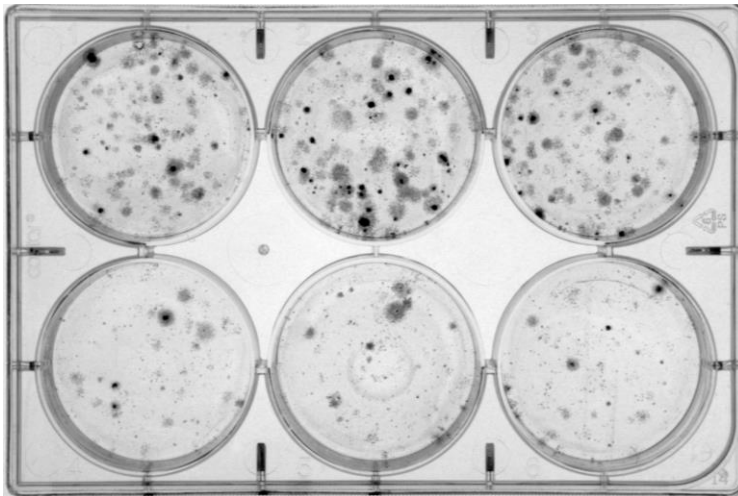

Doxy (+)

Supp Figure 7d  
DMS-273 shRNA RUNX1T1 colonies

Run 2

1000 cells/well

DMS-273-FHIUTG

Doxy (-)

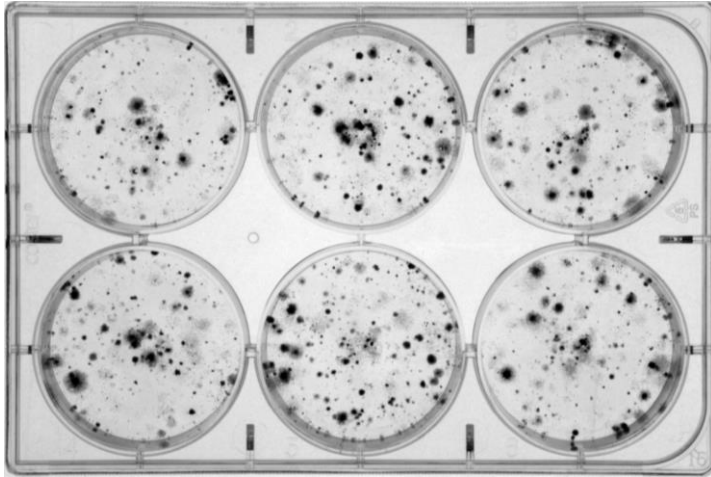

Doxy (+)

DMS-273-Sh#1

Doxy (-)

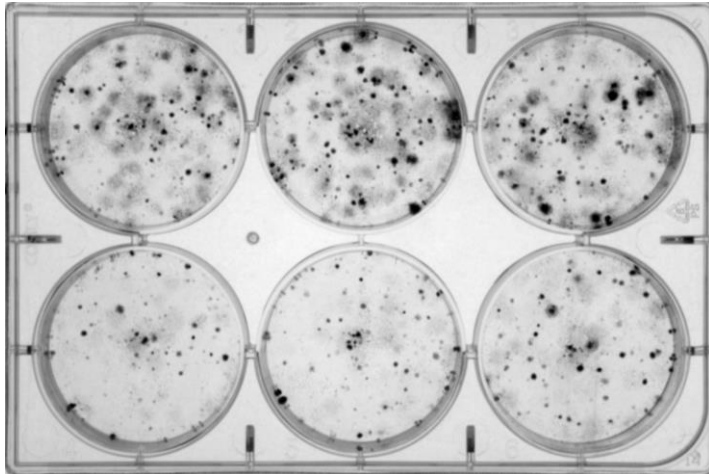

Doxy (+)

DMS-273-Sh#2

Doxy (-)

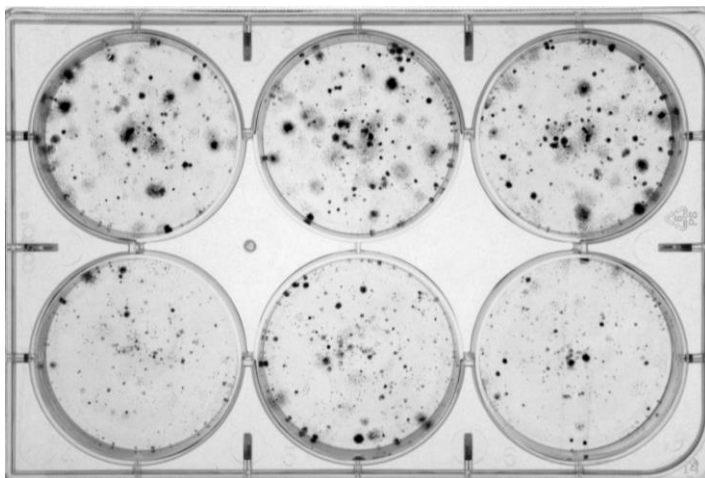

Doxy (+)

Supp Figure 7d  
DMS-273 shRNA RUNX1T1 colonies

Run 3

1000 cells/well

DMS-273-FHIUTG

Doxy (-)

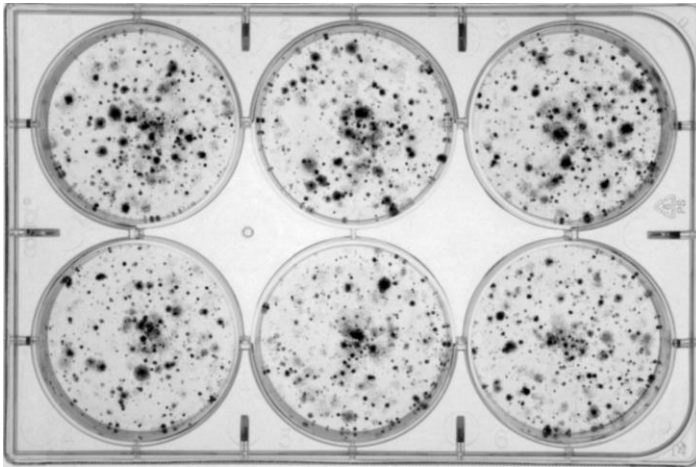

Doxy (+)

DMS-273-Sh#1

Doxy (-)

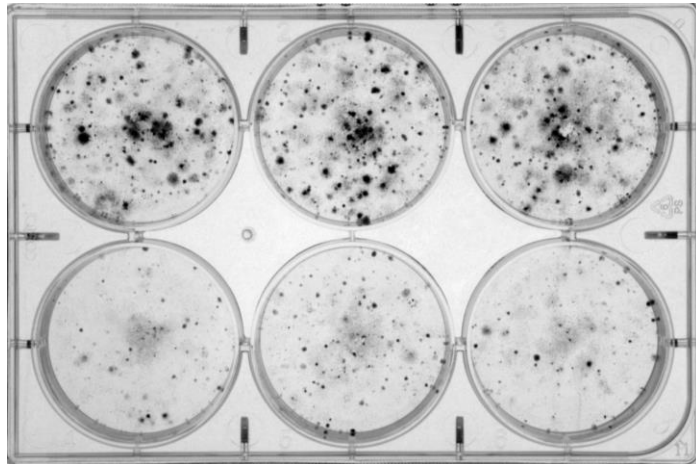

Doxy (+)

DMS-273-Sh#2

Doxy (-)

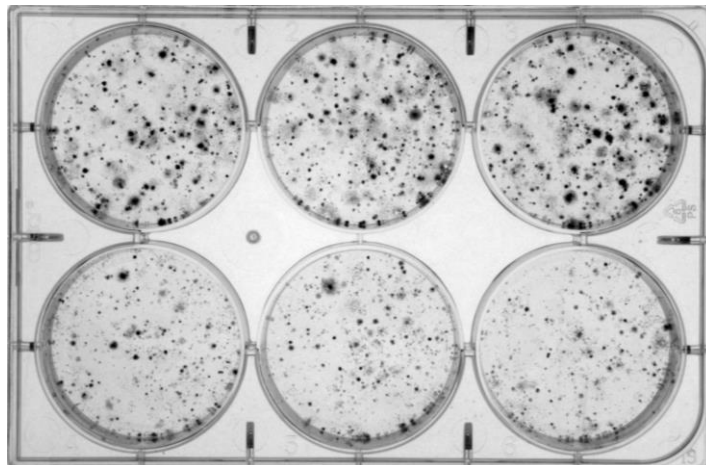

Doxy (+)

# Supp Figure 7e

## DMS-53 with RUNX1T1 and ACTIN

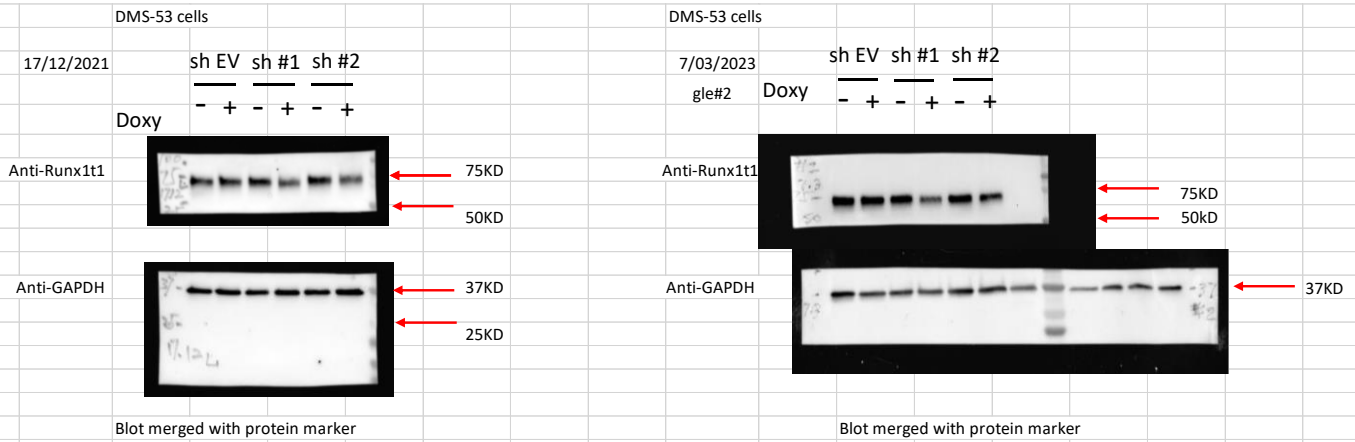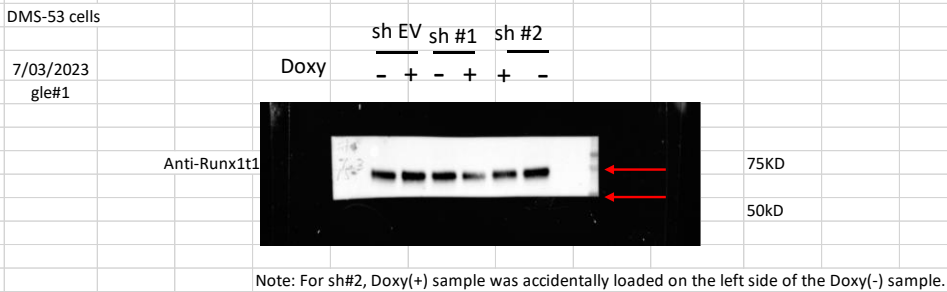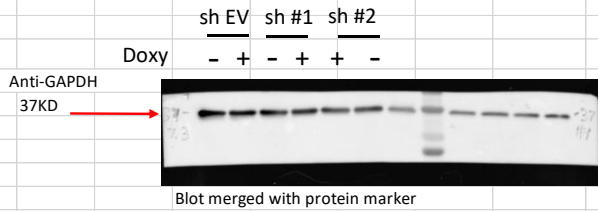

Supp Figure 7e  
DMS-53 with shRNA RUNX1T1 colonies

Run1

500 cells/well

DMS-53/FH1UTG

Doxy (-)

Doxy (+)

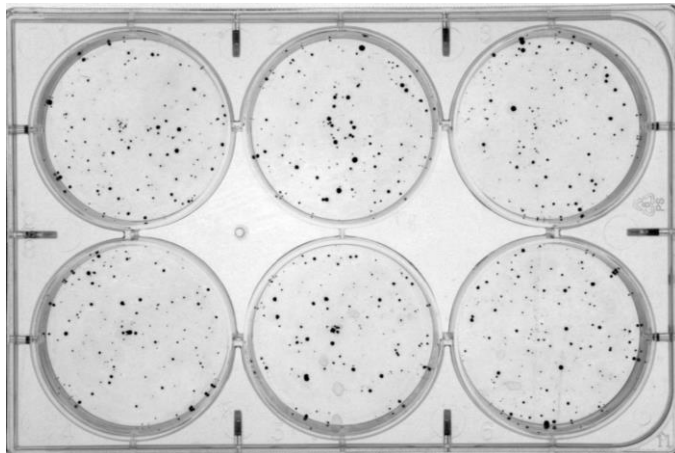

DMS-53/sh#1

Doxy (-)

Doxy (+)

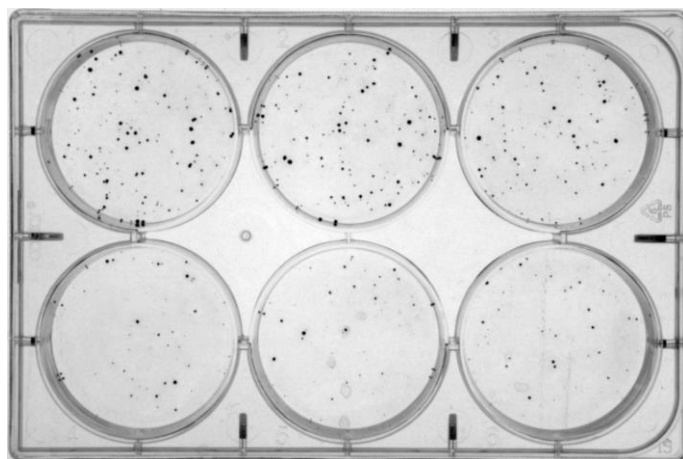

DMS-53/sh#2

Doxy (-)

Doxy (+)

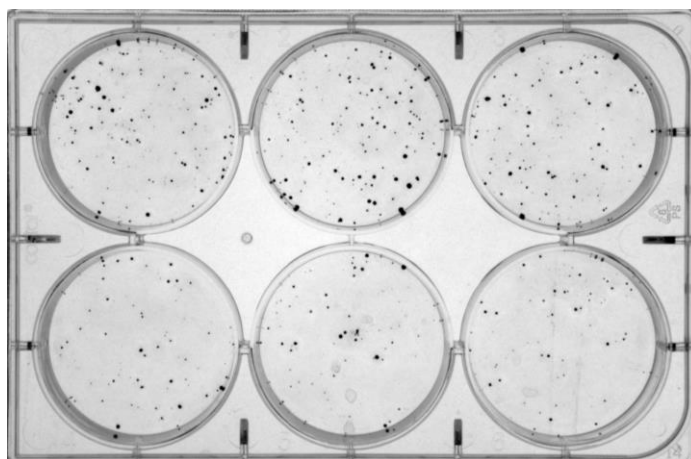

Supp Figure 7e  
DMS-53 with shRNA RUNX1T1 colonies

Run 2

500 cells/well

DMS-53/FH1UTG

Doxy (-)

Doxy (+)

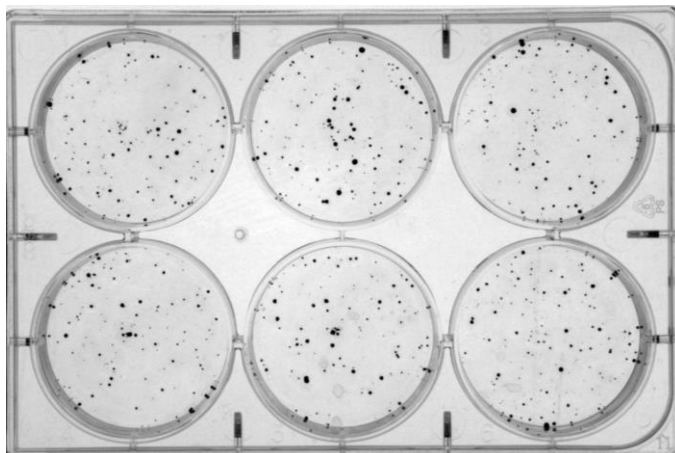

DMS-53/sh#1

Doxy (-)

Doxy (+)

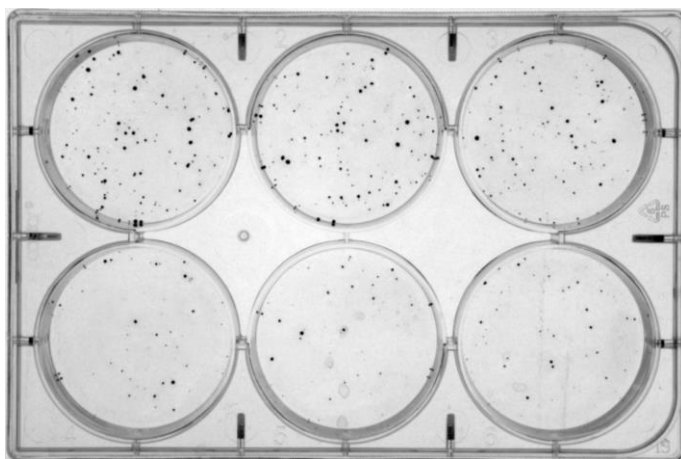

DMS-53/sh#2

Doxy (-)

Doxy (+)

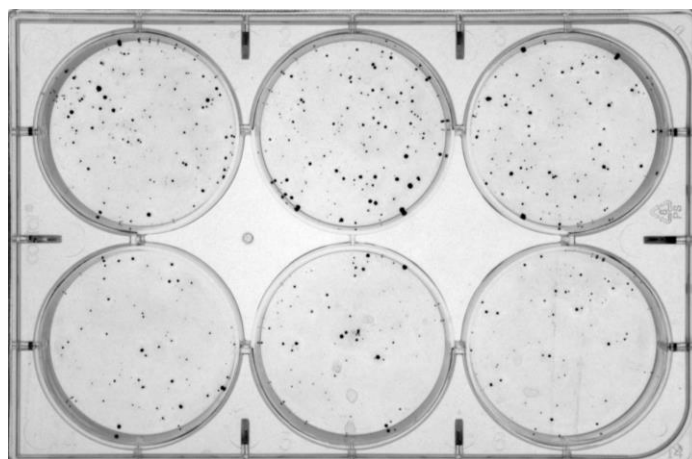

Supp Figure 7e  
DMS-53 with shRNA RUNX1T1 colonies

Run 3

500 cells/well

DMS-53/FH1UTG

Doxy (-)

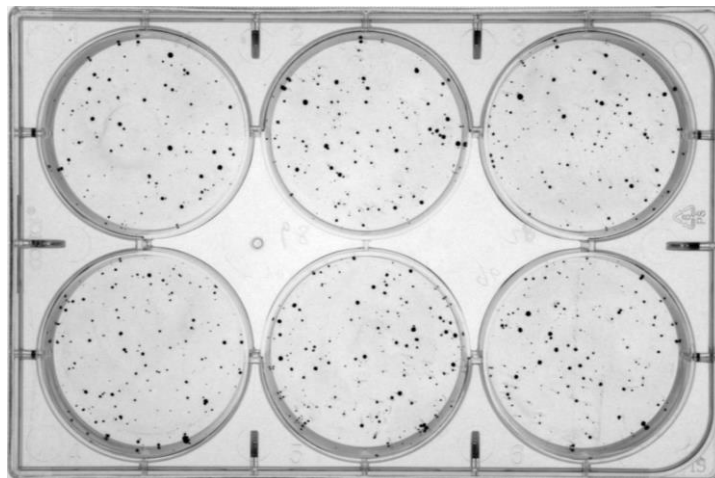

Doxy (+)

DMS-53/sh#1

Doxy (-)

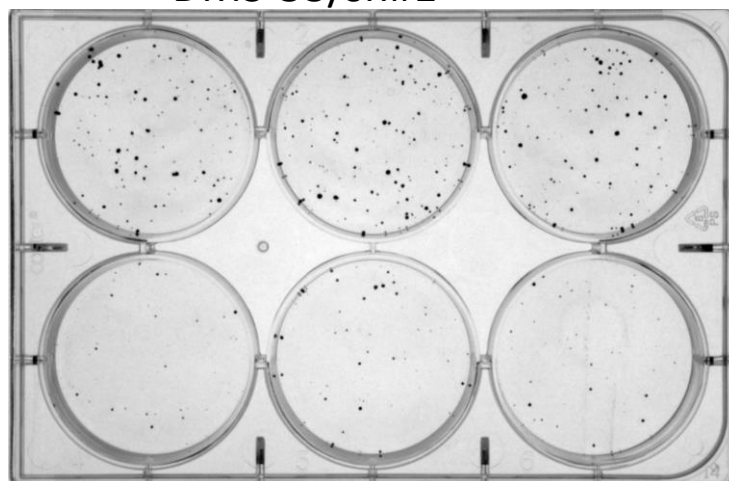

Doxy (+)

DMS-53/sh#2

Doxy (-)

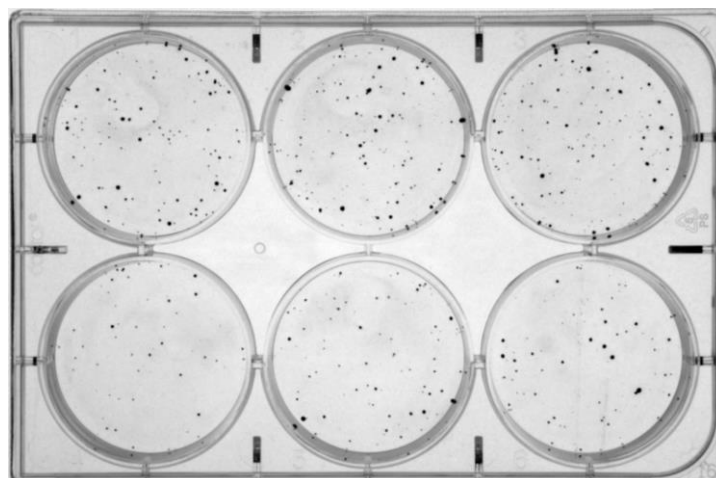

Doxy (+)
